# Supplementary material for: A Profile of the In Vitro Anti-Tumor Activity and In Silico ADME Predictions of Novel Benzothiazole Amide-Functionalized Imidazolium Ionic Liquids
Source: PubMed Central journal article supplement (PMC6627815; doi:10.3390/ijms20122865), 2019-06-12
Supplement: ijms-20-02865-s001.pdf [file ijms-20-02865-s001.pdf]

# A Profile of the *in vitro* Anti-tumor Activity Against Breast and Colon Cancer Cell Lines of novel specific ionic liquids based imidazole, benzothiazole conjugates

Fawzia F. Al-blewi, Nadjat Rezki,\* Arshi Naqvi, Husna A. Qutb eddn, Salsabeel A. Al-Sodies, Mouslim Messali, Mohamed R. Aouad, Sanaa K. Bardaweel\*

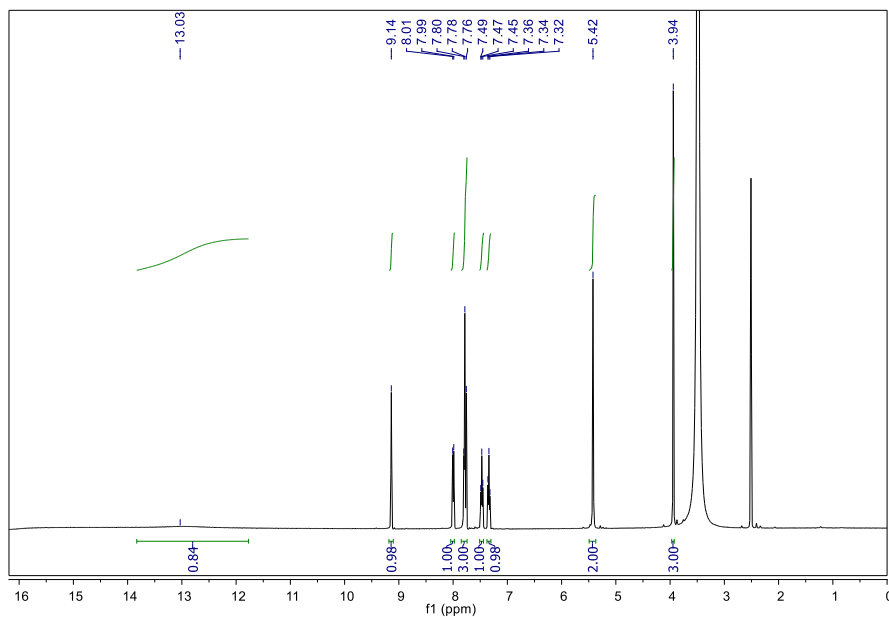

Figure S1. <sup>1</sup>H NMR of Compound 6.

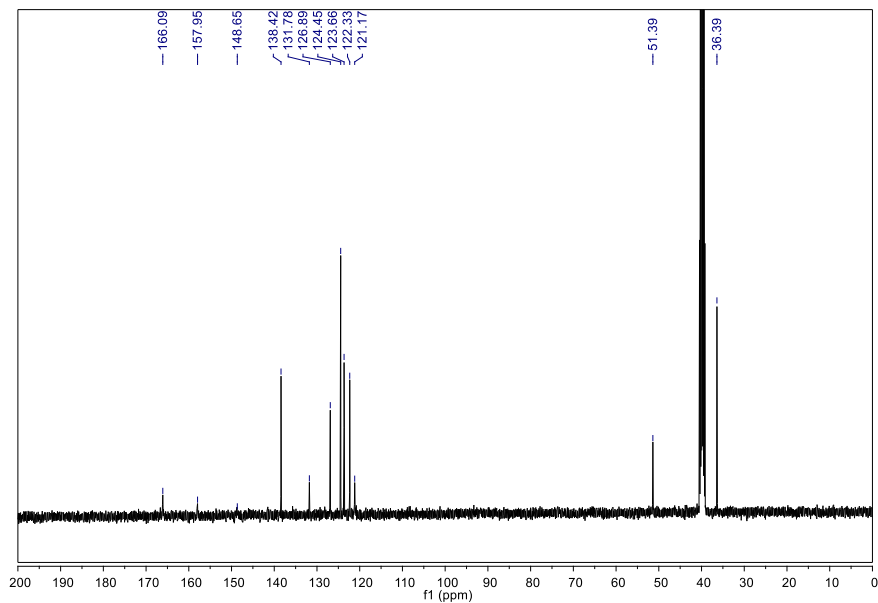

Figure S2. <sup>13</sup>C NMR of Compound 6.

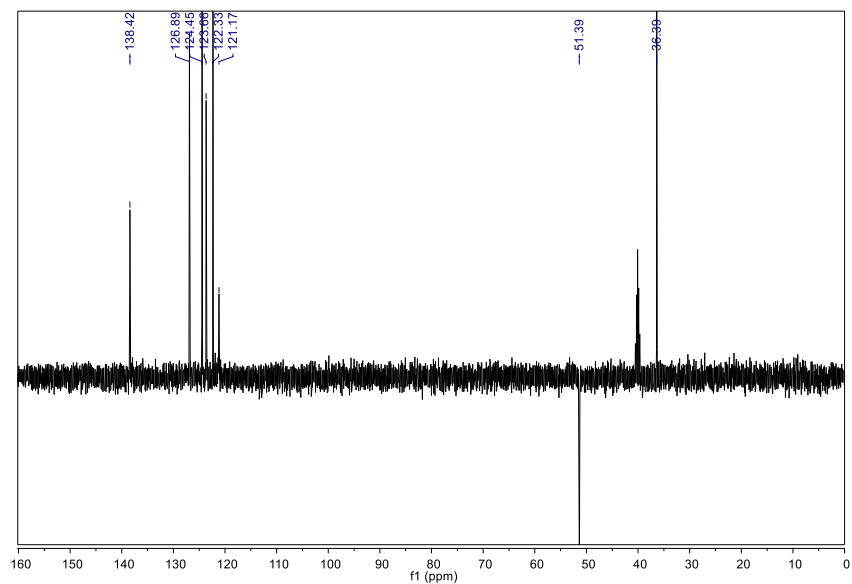

Figure S3. DEPT-135 NMR of Compound 6.

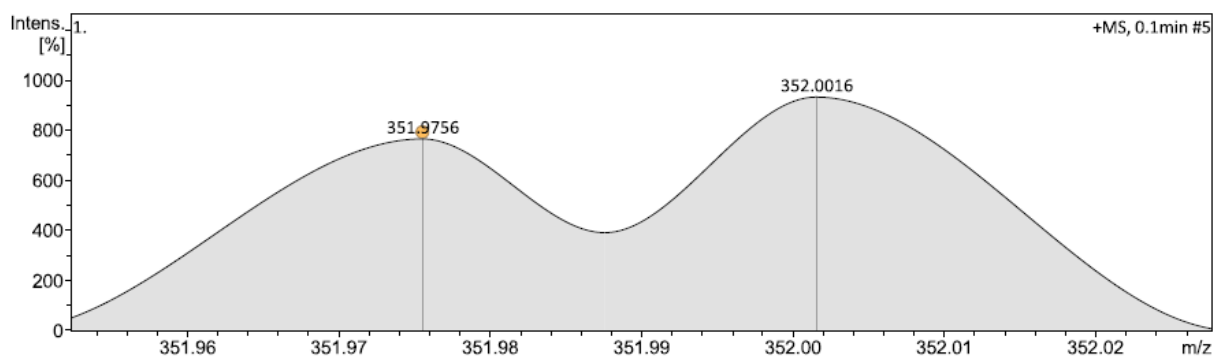

Figure S4. HRMS (ESI) of Compound 6.

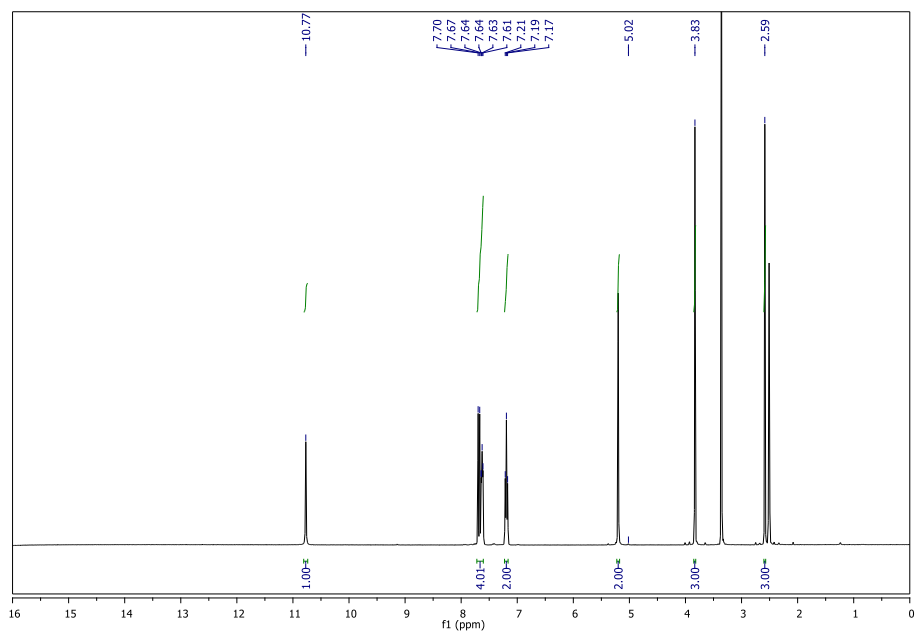

Figure S5.  $^1\text{H}$  NMR of Compound 7.

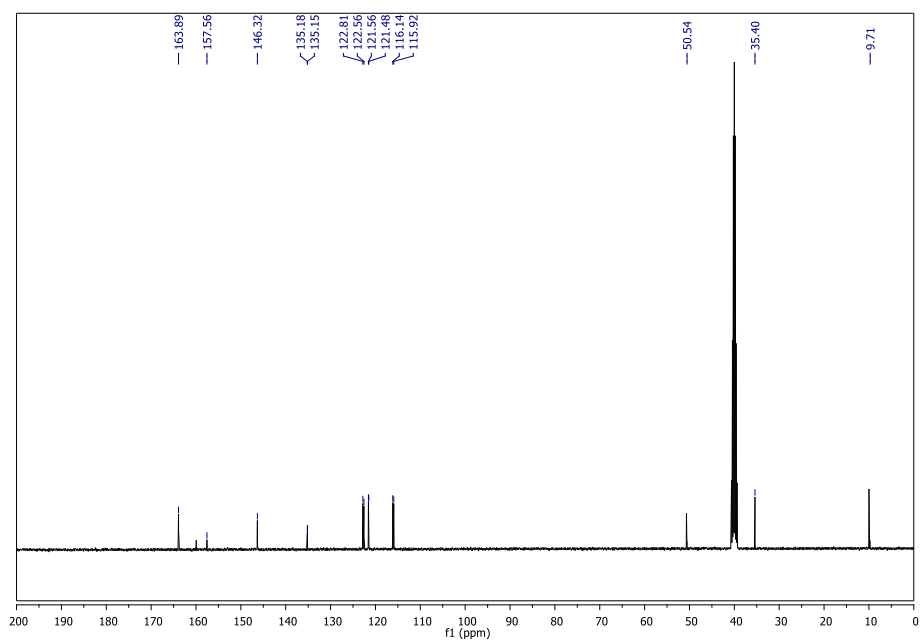

Figure S6.  $^{13}\text{C}$  NMR of Compound 7.

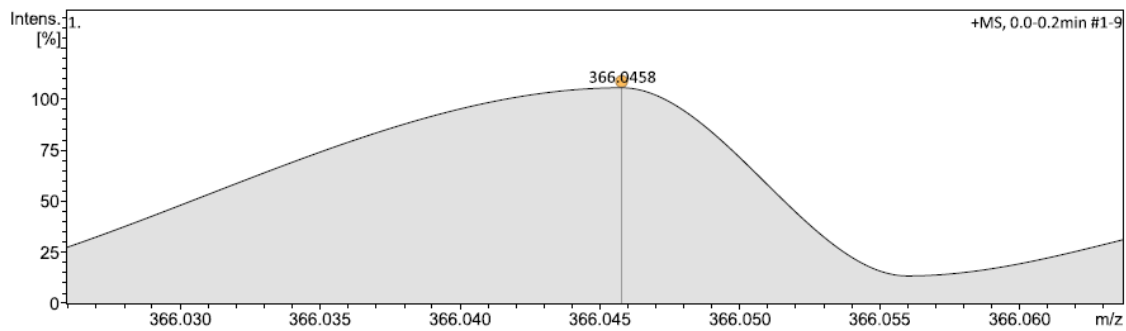

**Figure S7.** HRMS (ESI) of Compound 7.

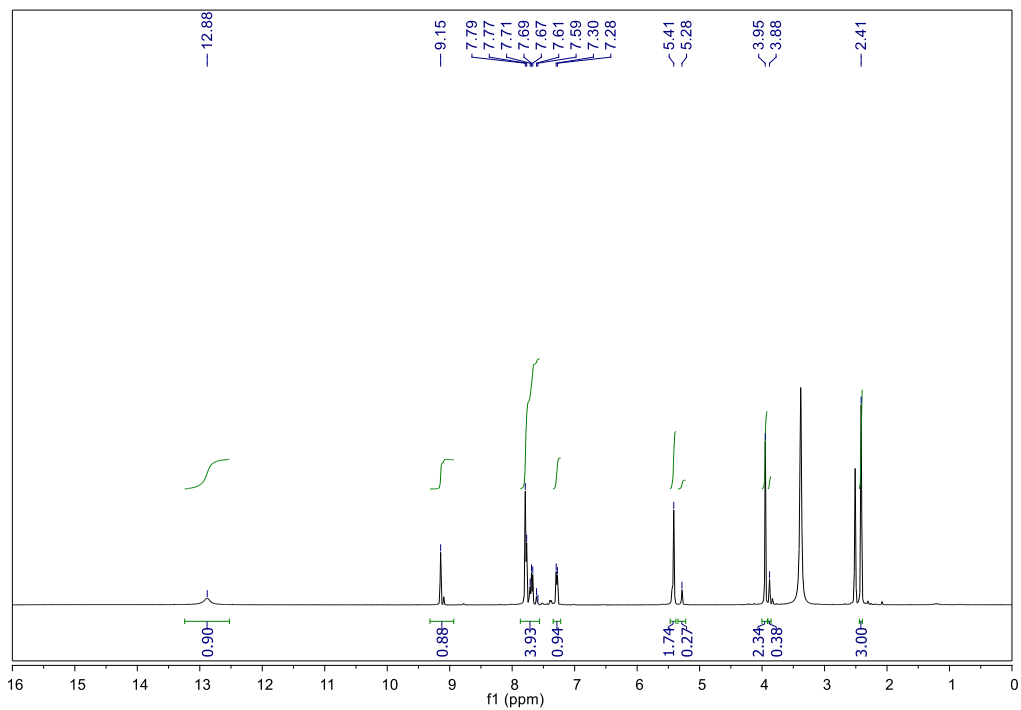

Figure S8. <sup>1</sup>H NMR of Compound 8.

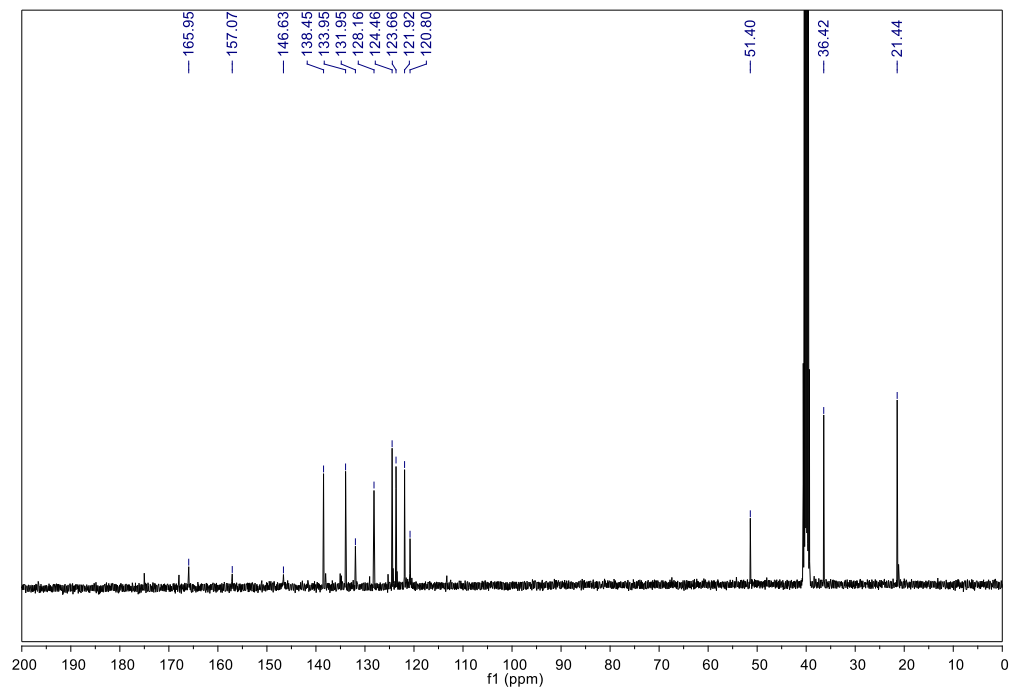

Figure S9. <sup>13</sup>C NMR of Compound 8.

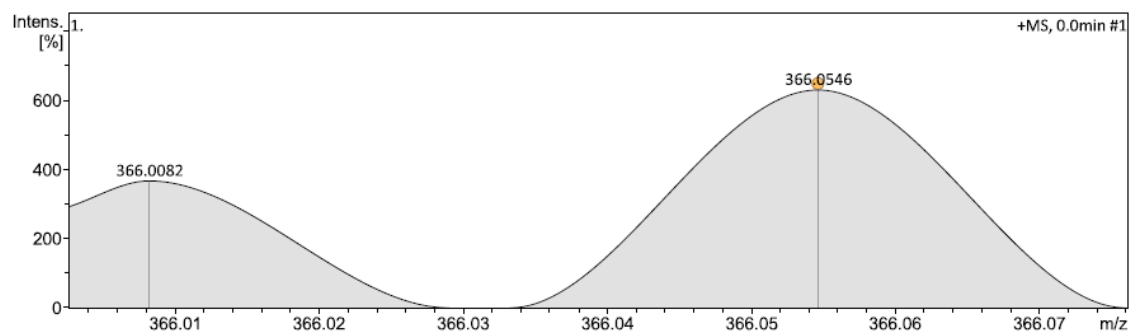

Figure S10. HRMS (ESI) of Compound 8.

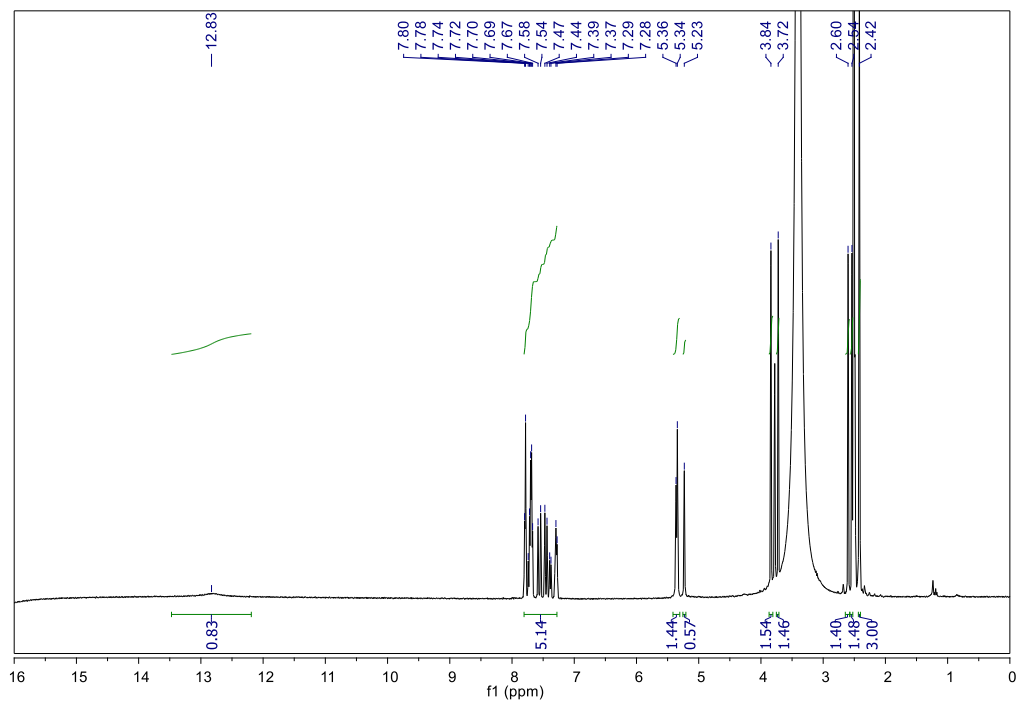

Figure S11.  $^1\text{H}$  NMR of Compound 9.

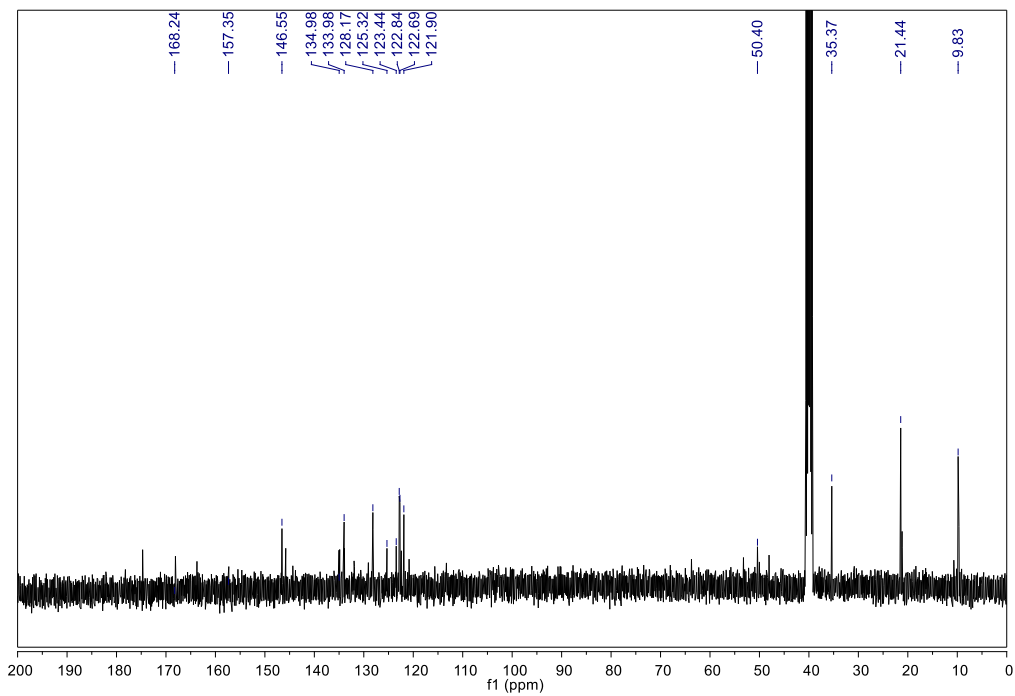

Figure S12.  $^{13}\text{C}$  NMR of Compound 9.

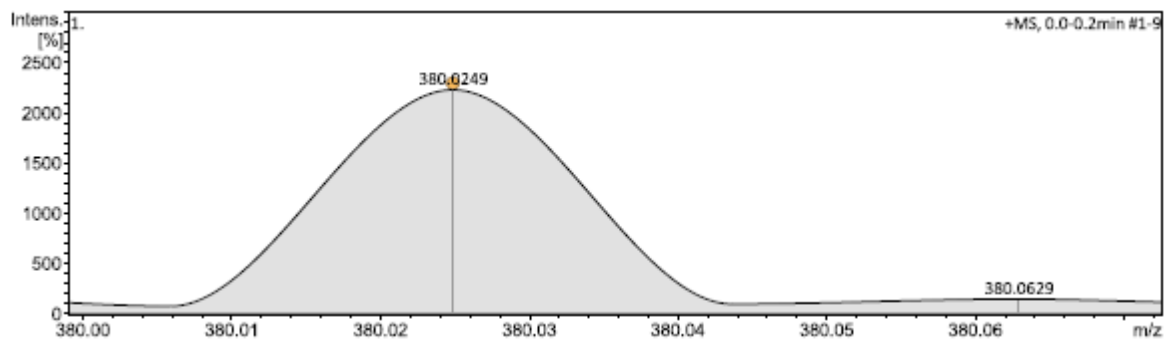

**Figure S13.** HRMS (ESI) of Compound 9.



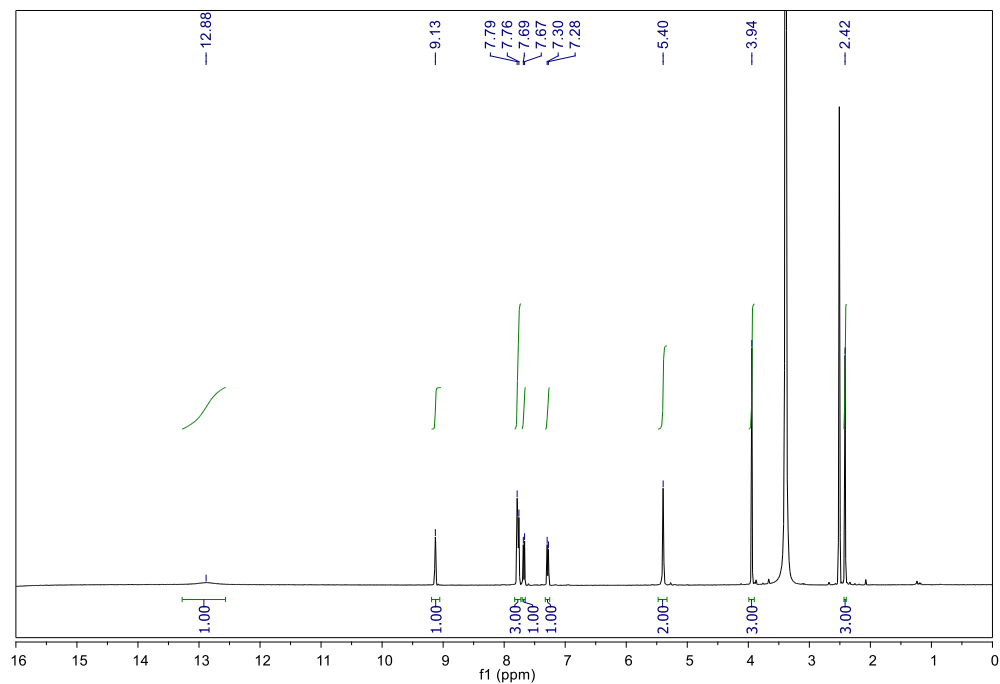

Figure S14.  $^1\text{H}$  NMR of Compound 10.

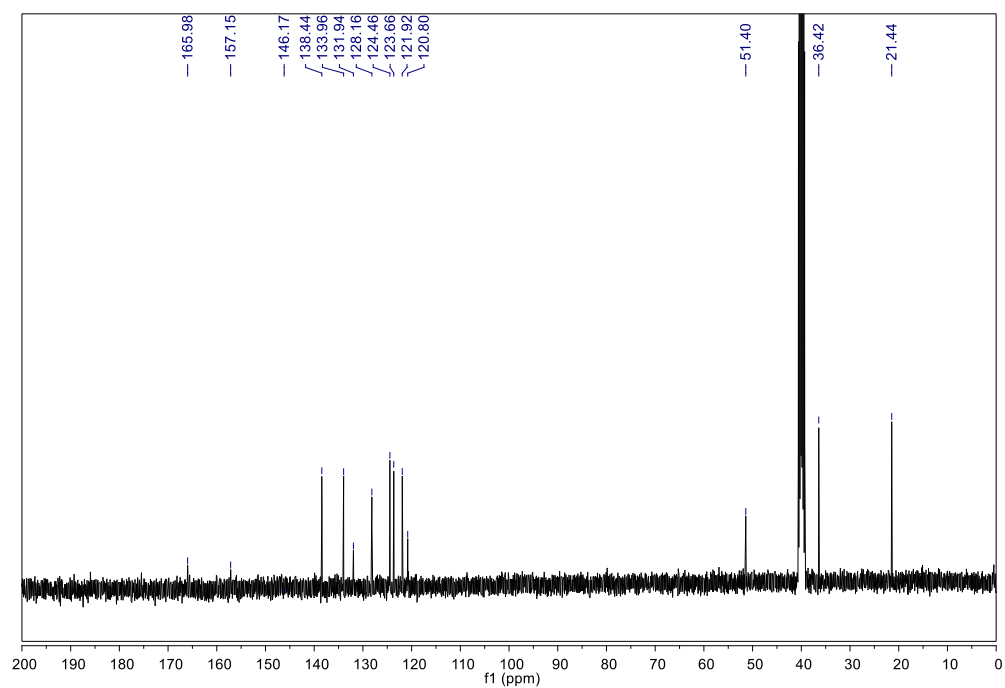

Figure S15.  $^{13}\text{C}$  NMR of Compound 10.

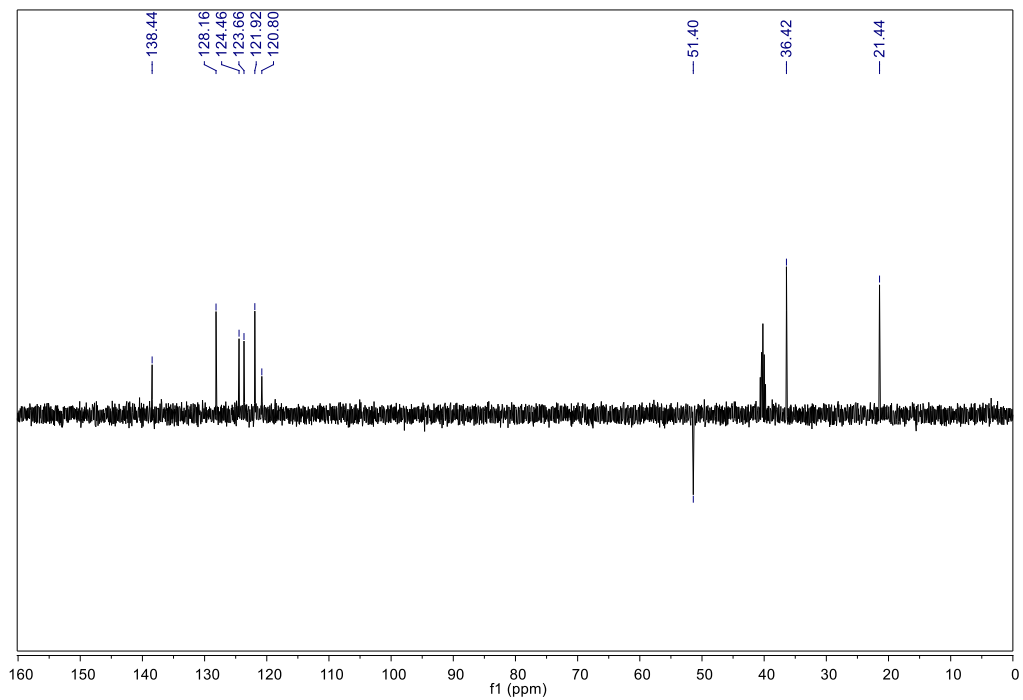

Figure S16. Dept-135 NMR of Compound 10.

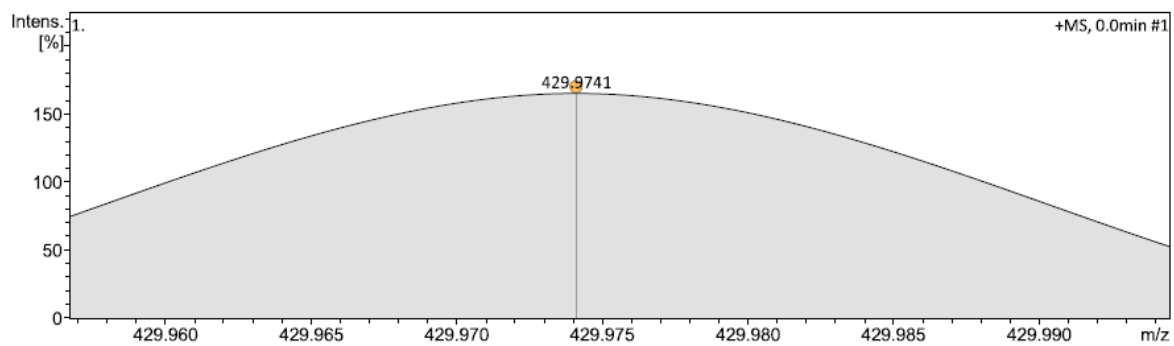

Figure S17. HRMS (ESI) of Compound 10.

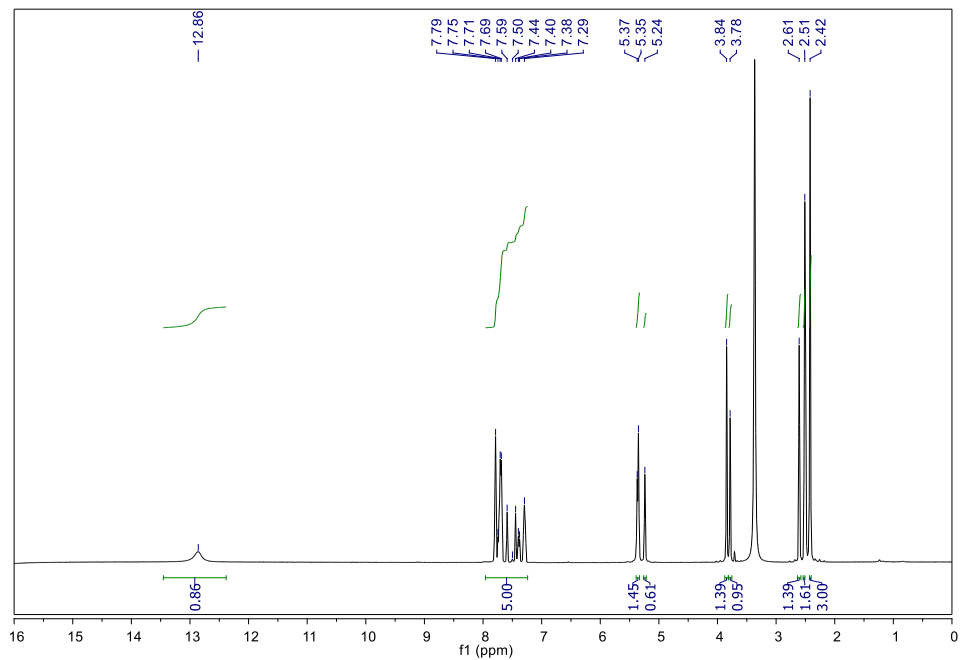

Figure S18. <sup>1</sup>H NMR of Compound 11.

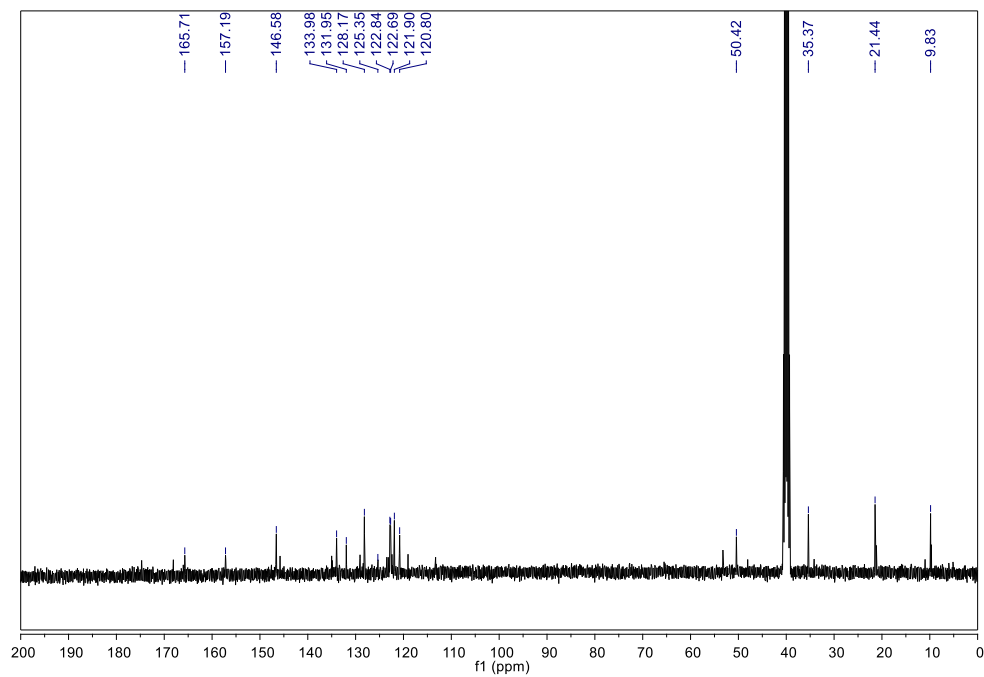

Figure S19. <sup>13</sup>C NMR of Compound 11.

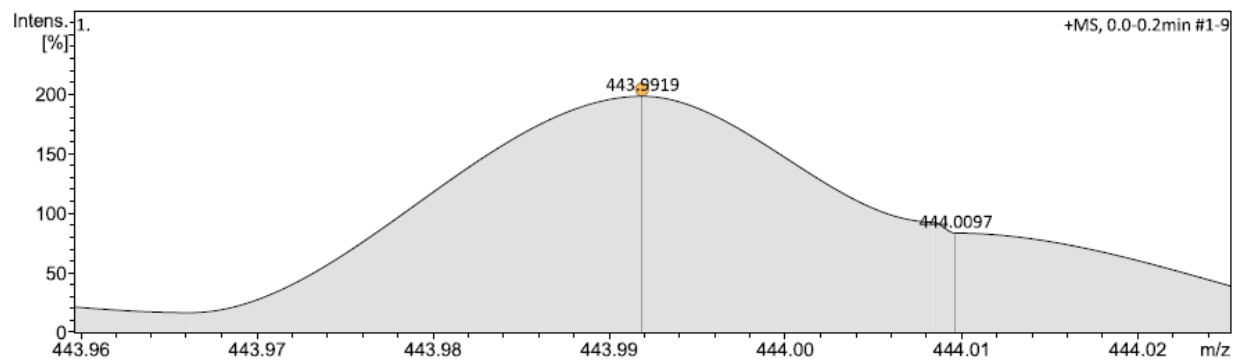

**Figure S20.** HRMS (ESI) of Compound **11**.

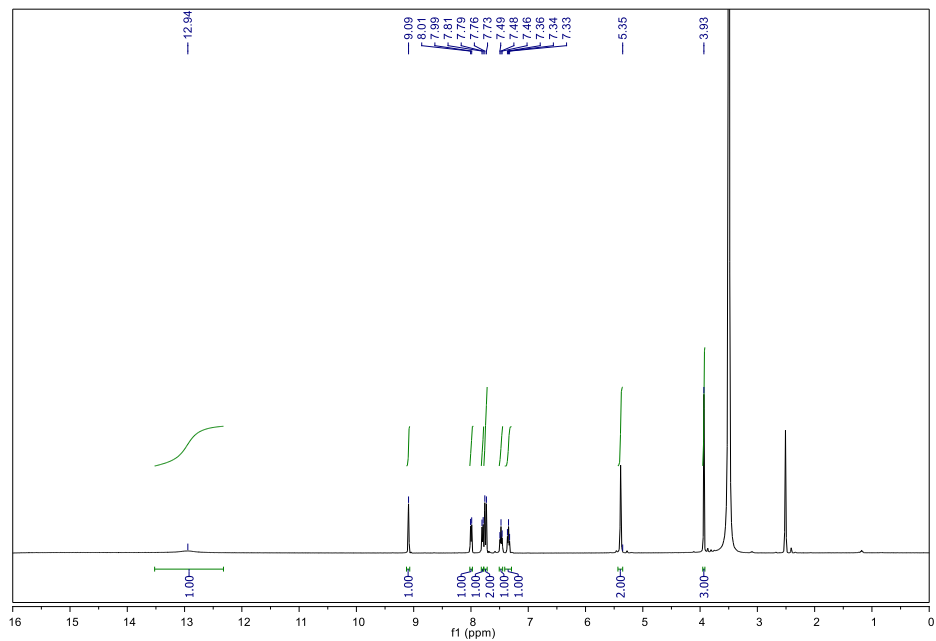

Figure S21. <sup>1</sup>H NMR of Compound 12.

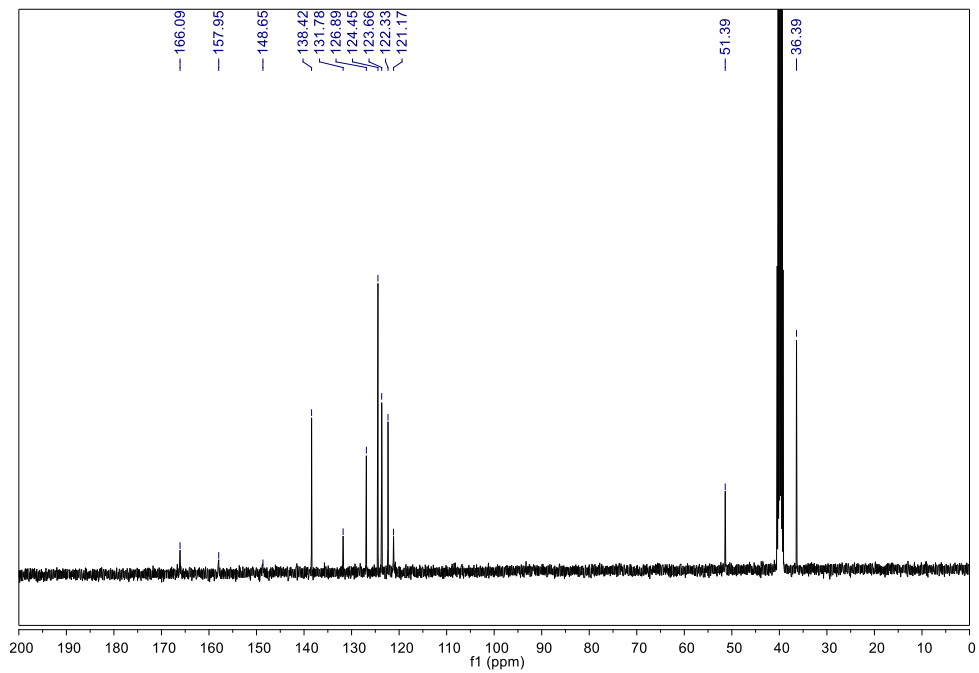

Figure S22. <sup>13</sup>C NMR of Compound 12.

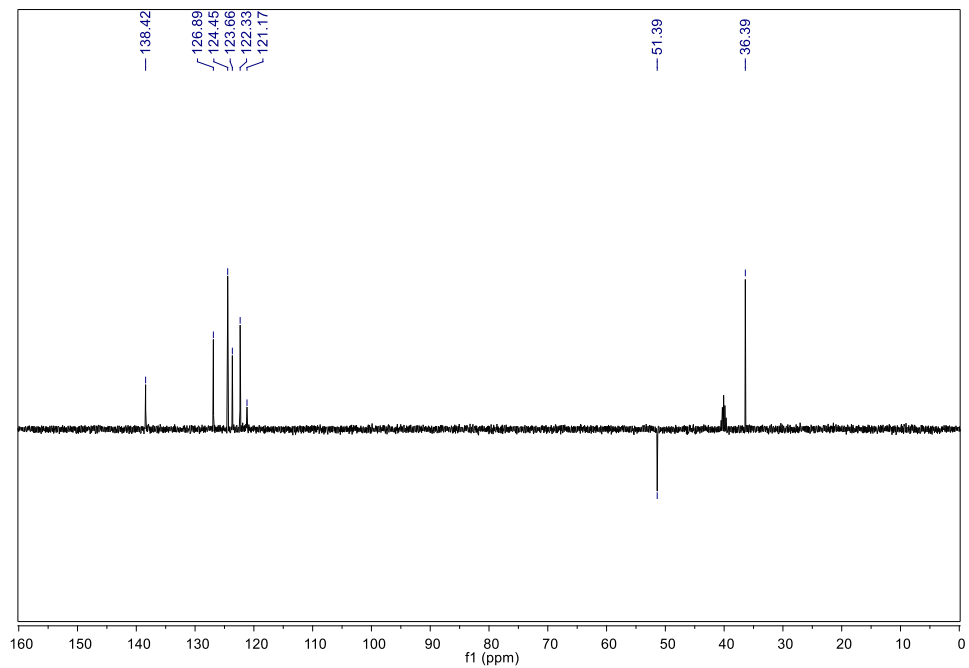

Figure S23. Dept-135 NMR of Compound 12.

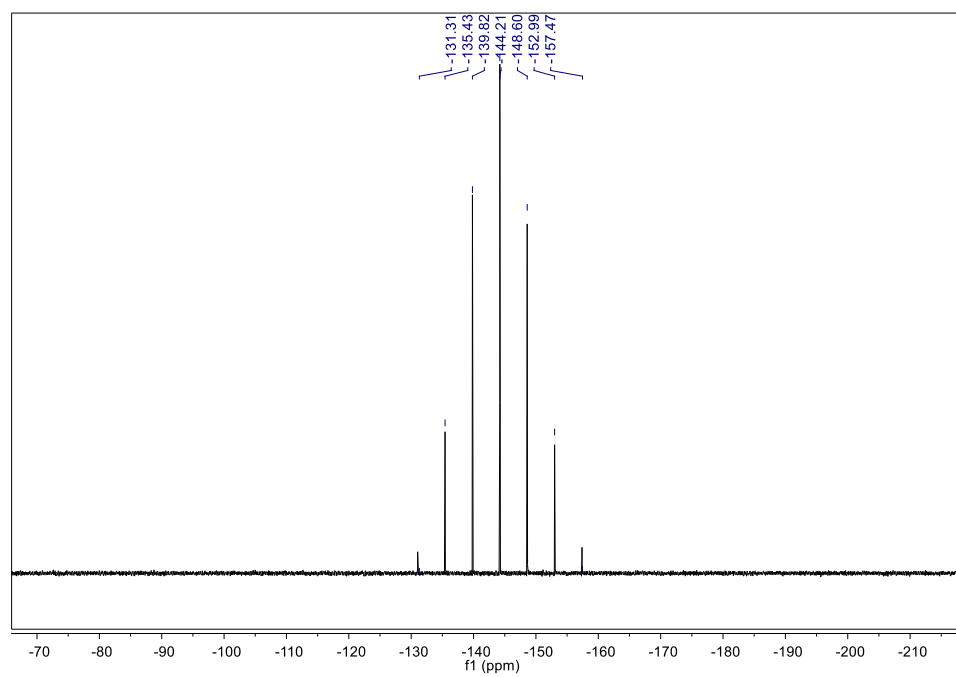

Figure S24. <sup>31</sup>P NMR of Compound 12.

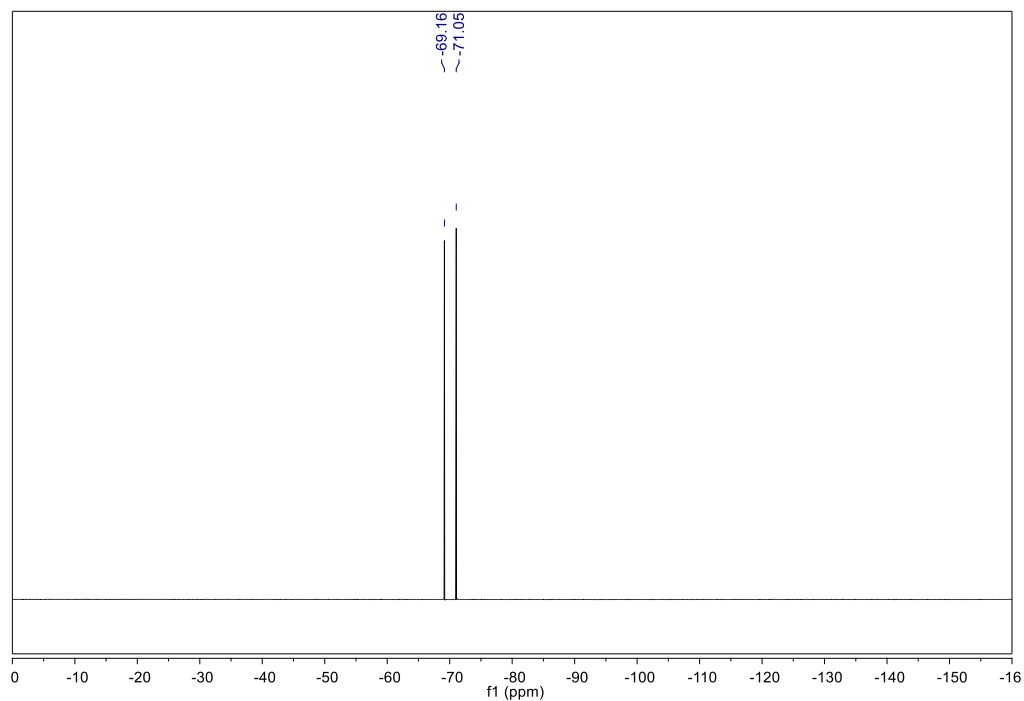

**Figure S25.**  $^{19}\text{F}$ NMR of Compound **12**.

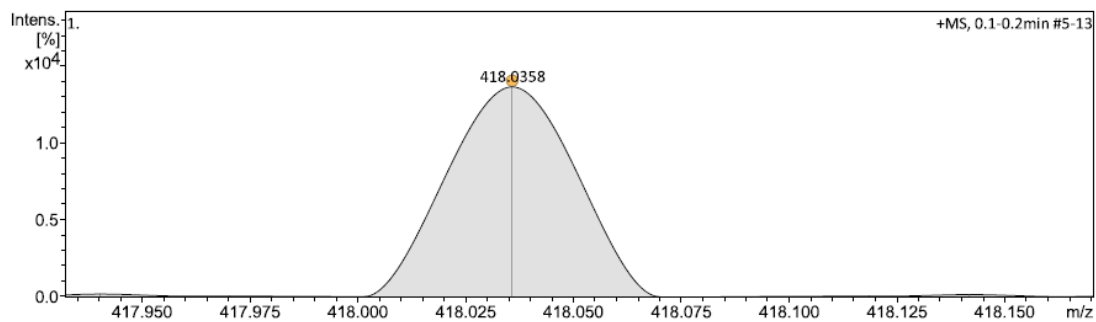

**Figure S26.** HRMS (ESI) of Compound **12**.

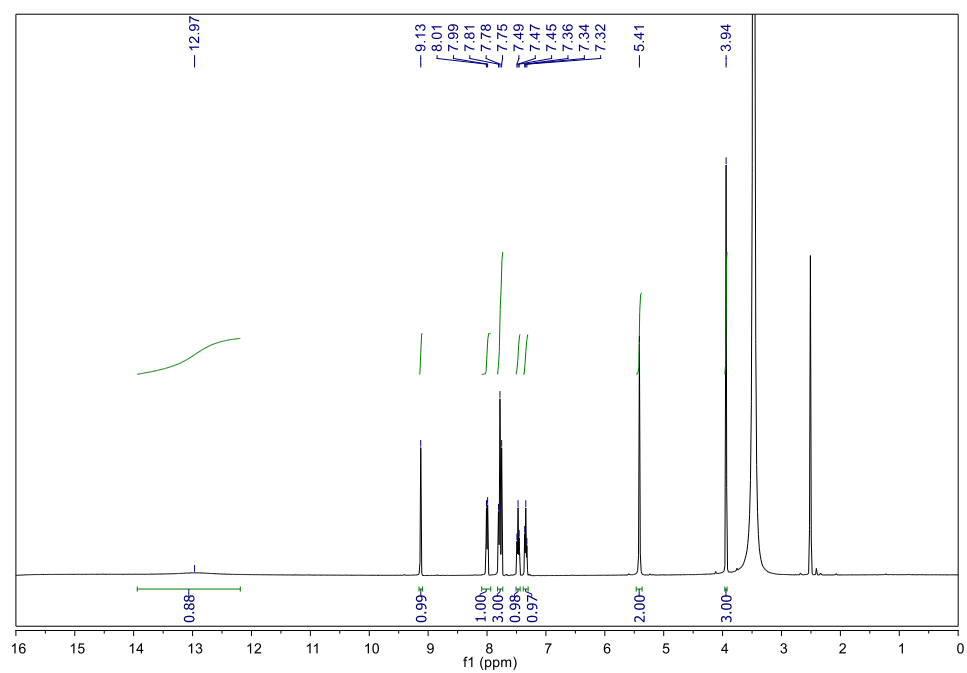

Figure S27.  $^1\text{H}$  NMR of Compound 13.

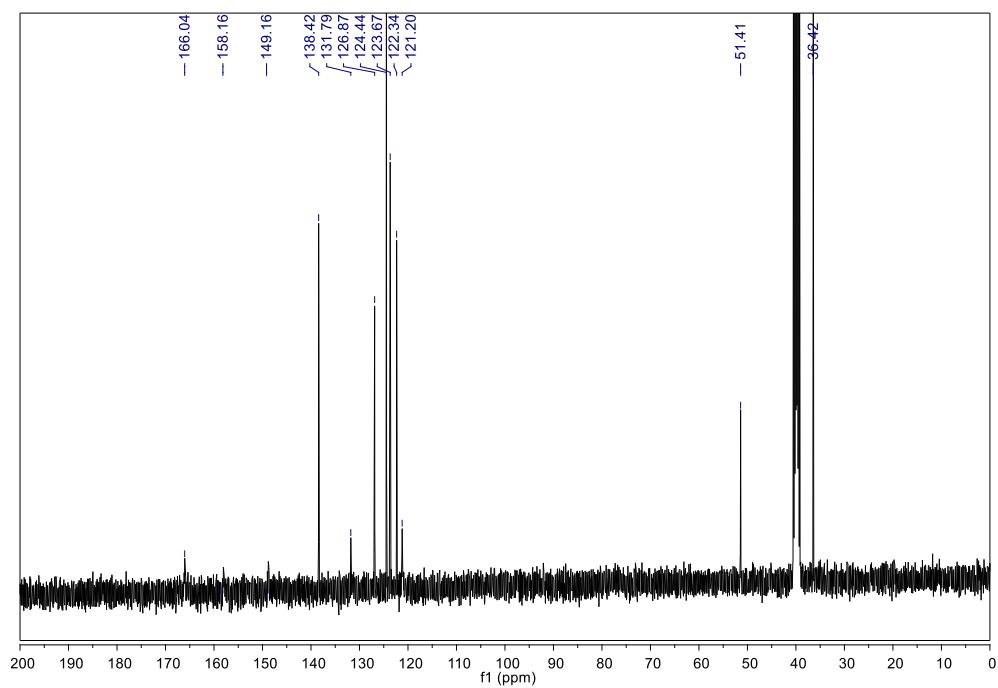

Figure S28.  $^{13}\text{C}$  NMR of Compound 13.





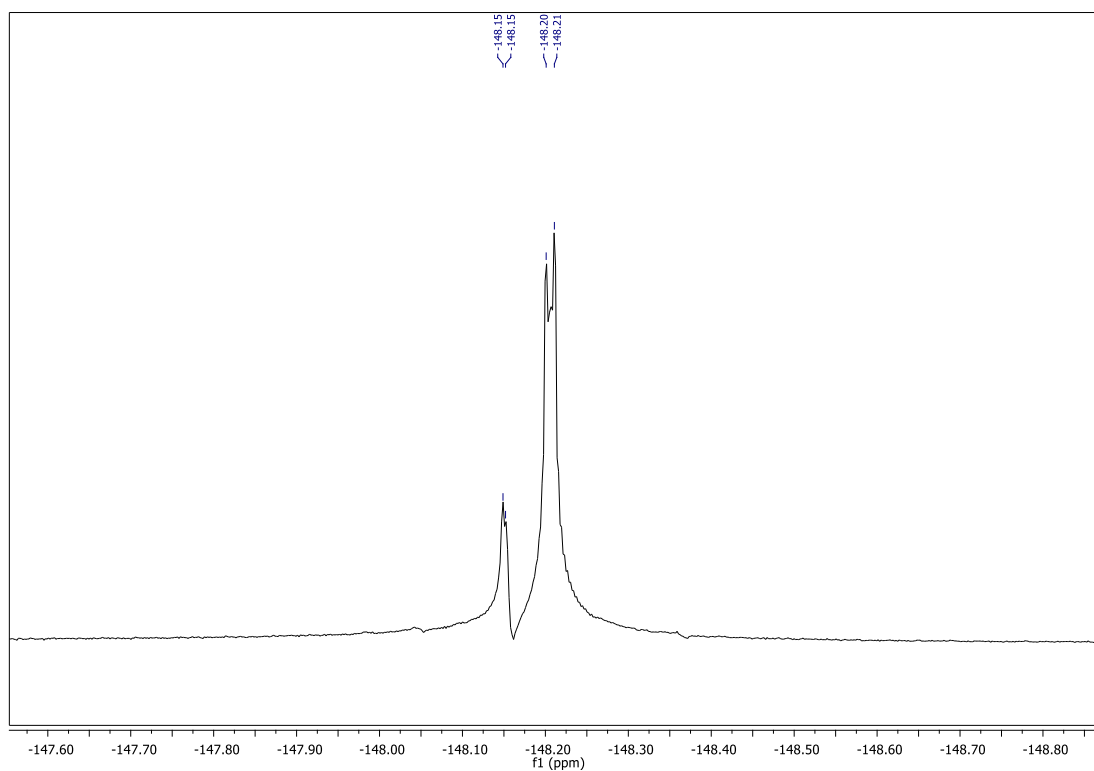

Figure S31.  $^{19}\text{F}$ NMR of Compound 13.

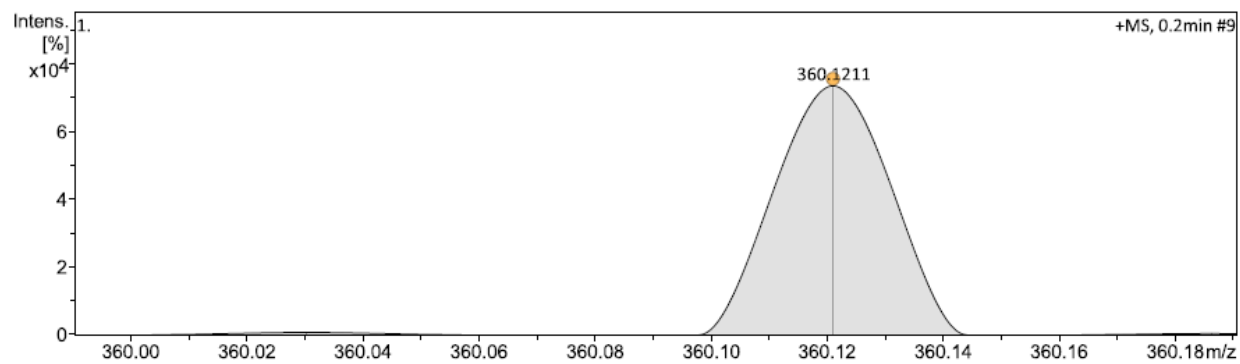

Figure S32. HRMS (ESI) of Compound 13.

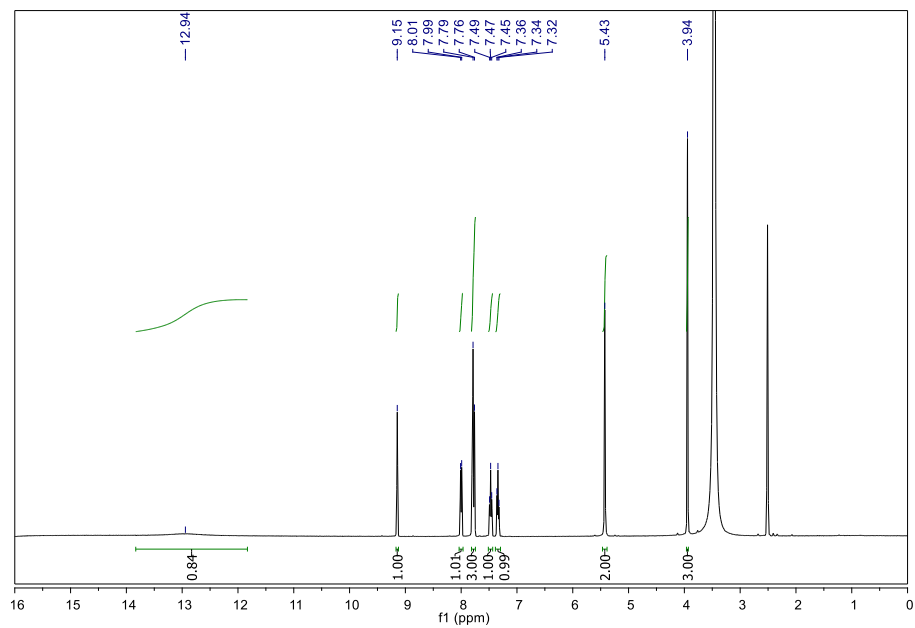

Figure S33.  $^1\text{H}$  NMR of Compound 14.

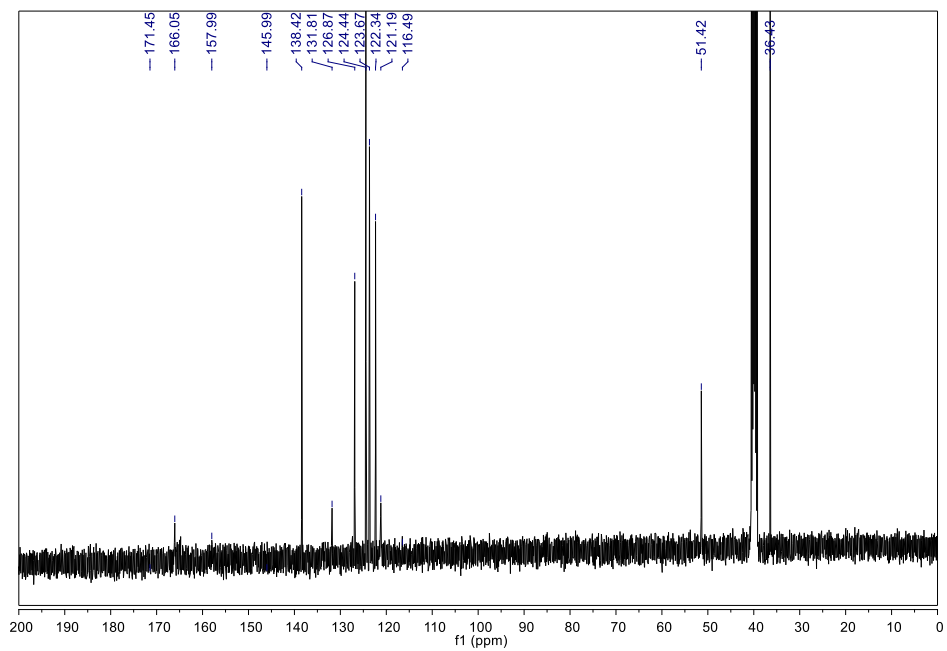

Figure S34.  $^{13}\text{C}$  NMR of Compound 14.

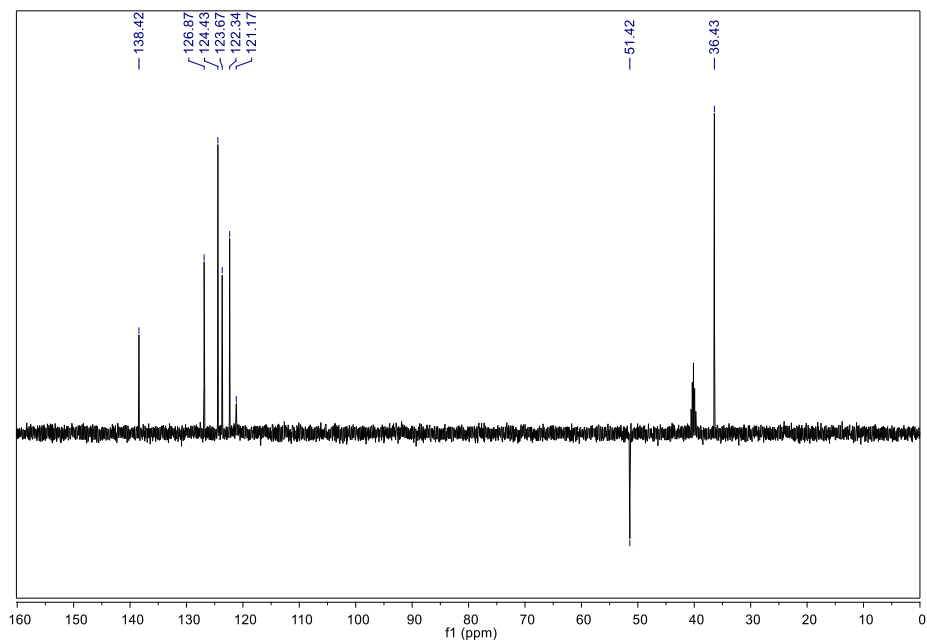

Figure S35. DEPT-135 NMR of Compound 14.

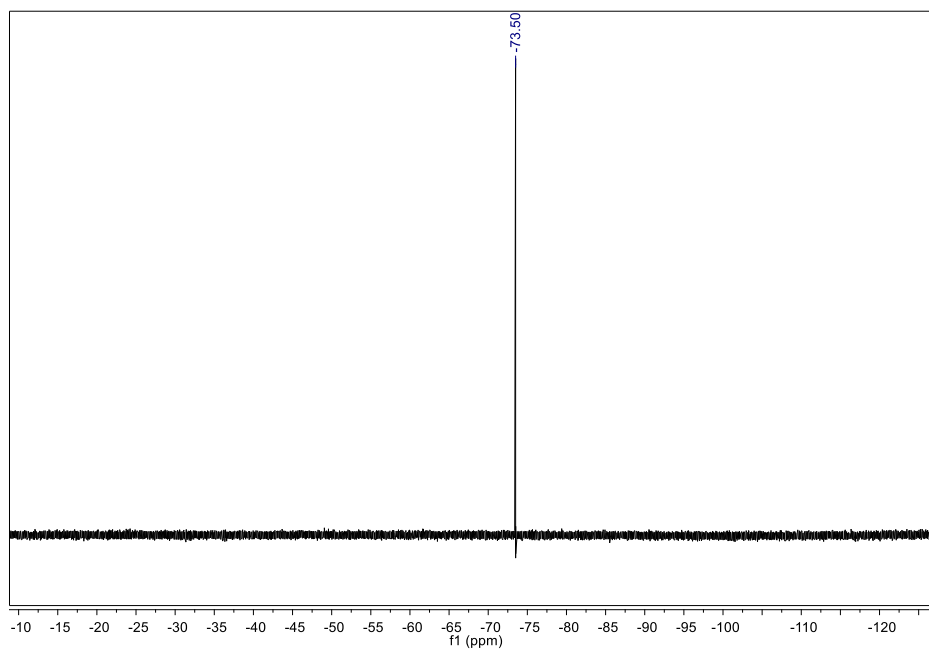

Figure S36. <sup>19</sup>F NMR of Compound 14.

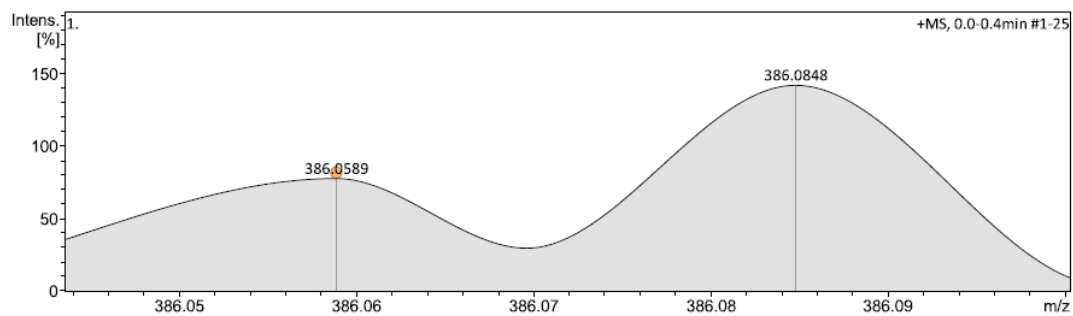

**Figure S37.** HRMS (ESI) of Compound **14**.



Figure S38. <sup>1</sup>H NMR of Compound 15.

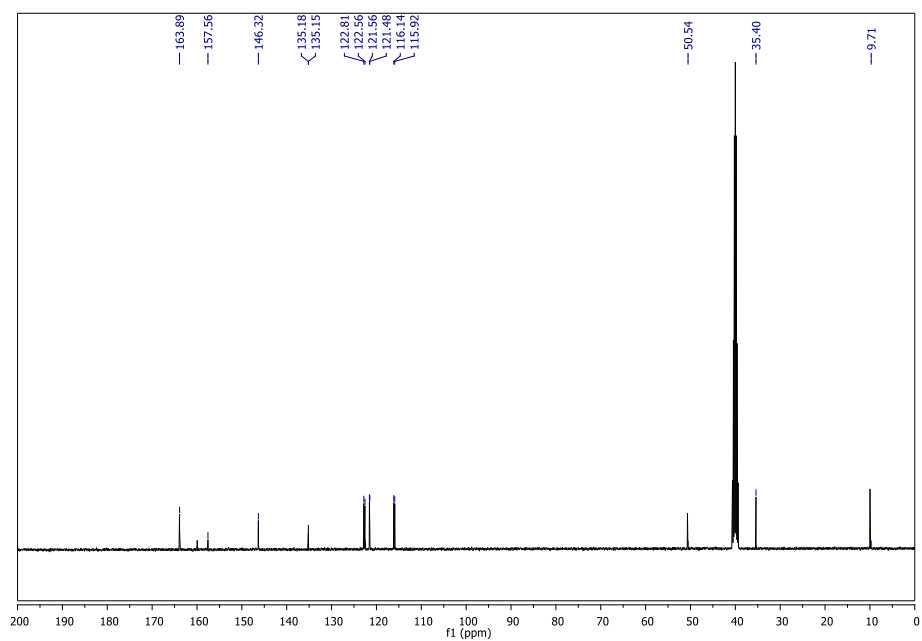

Figure S39. <sup>13</sup>C NMR of Compound 15.

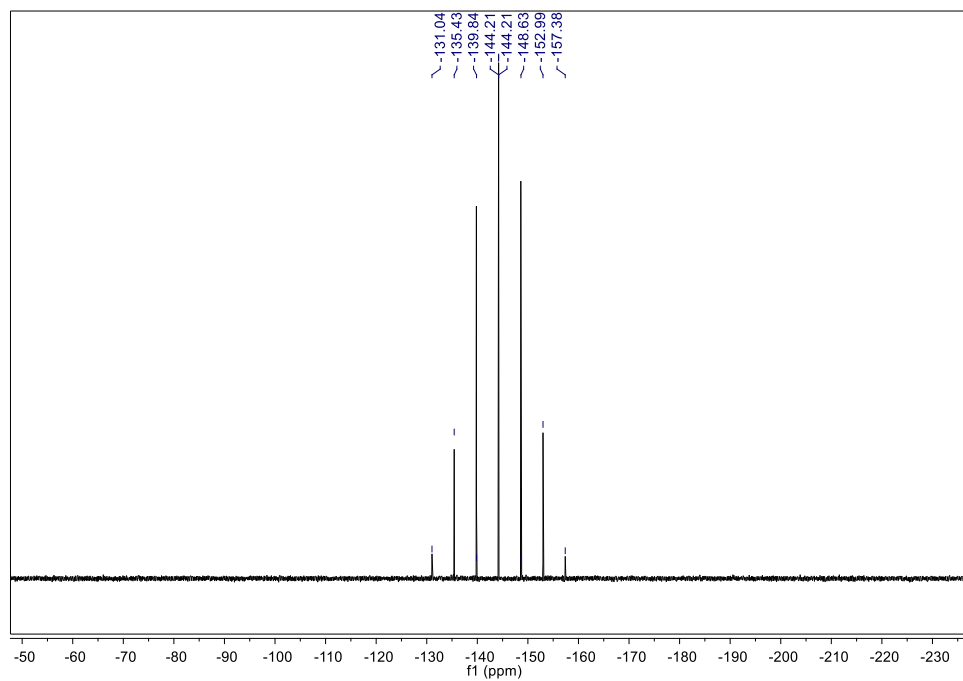

Figure S40.  $^{31}\text{P}$ NMR of Compound 15.

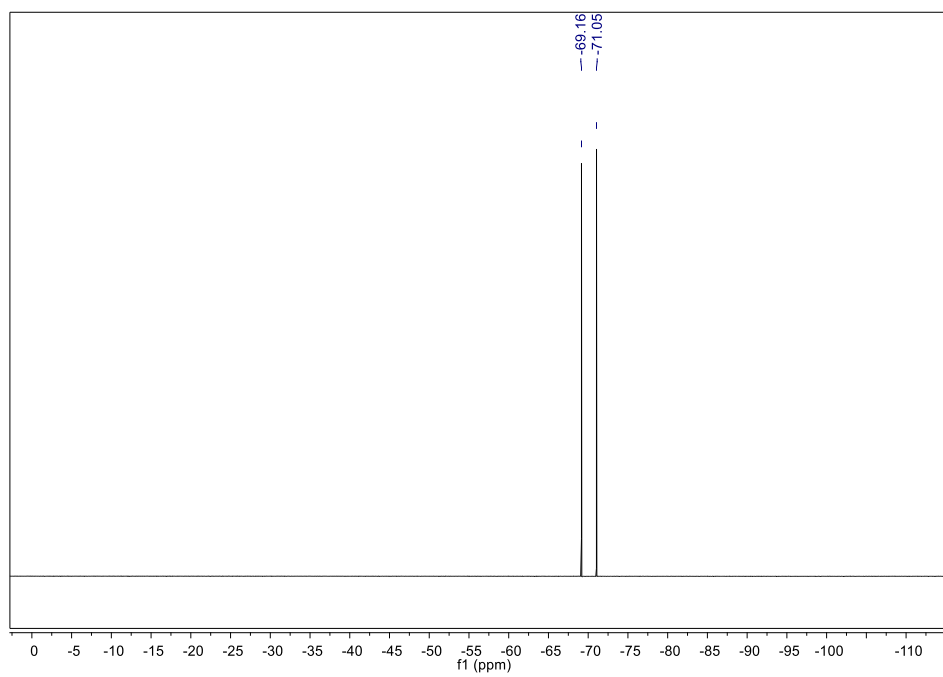

Figure S41.  $^{19}\text{F}$ NMR of Compound 15.

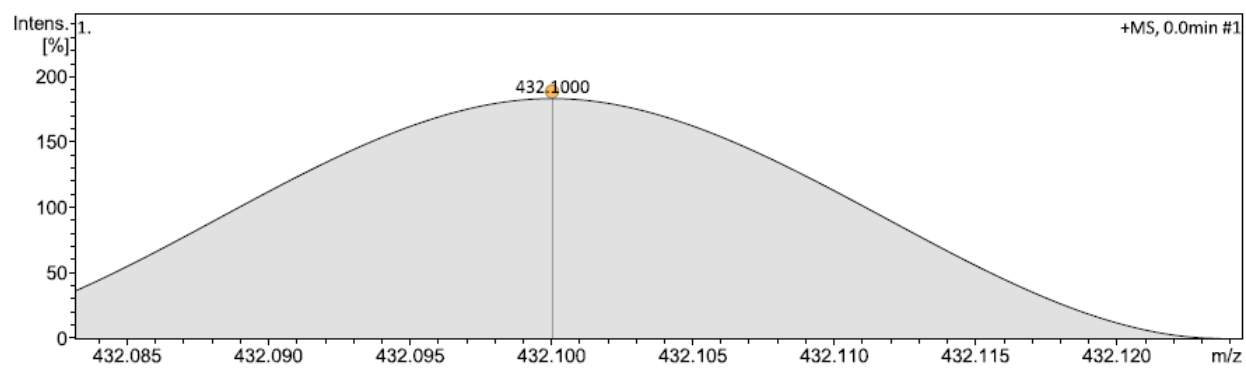

**Figure S42.** HRMS (ESI) of Compound **15**.



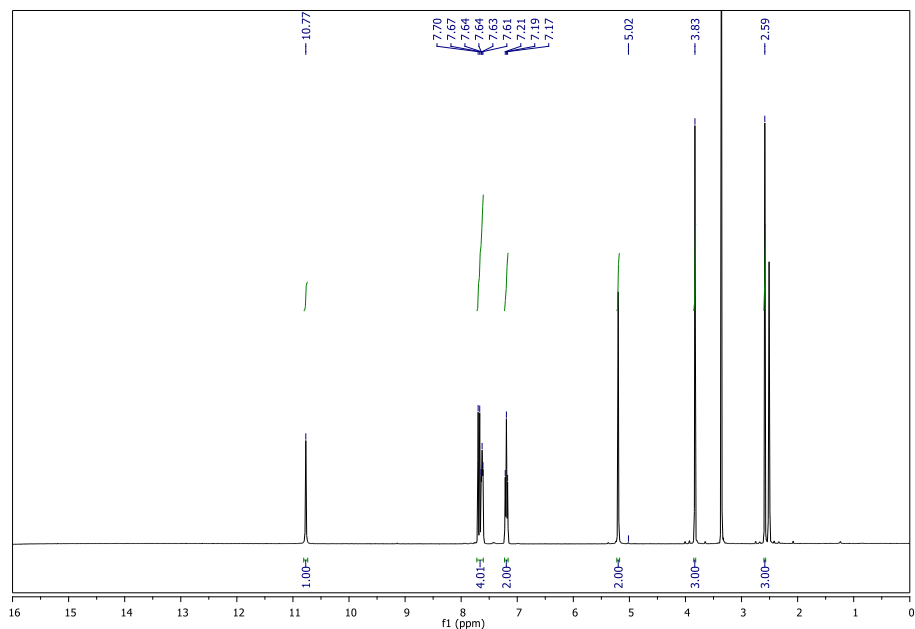

Figure S43.  $^1\text{H}$  NMR of Compound 16.

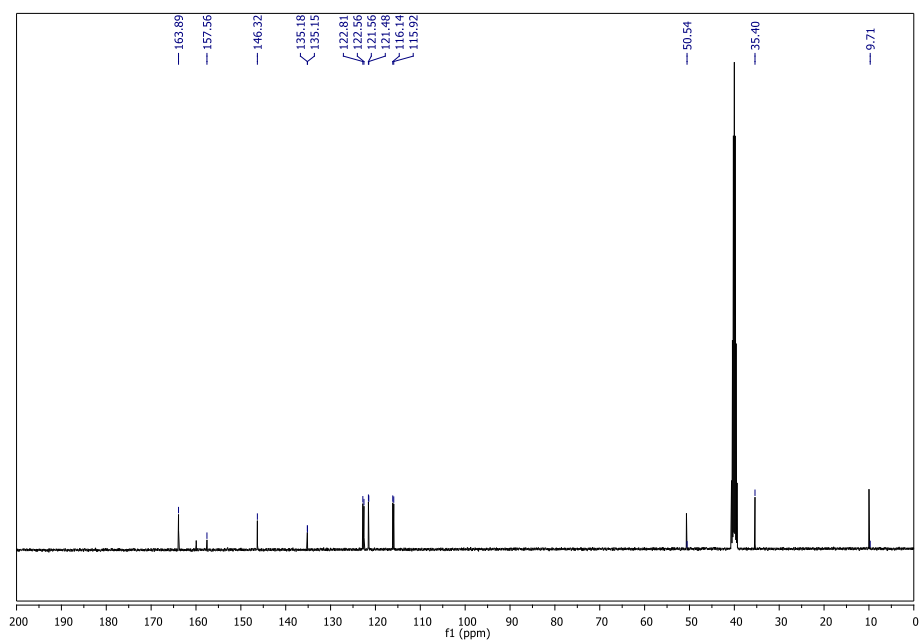

Figure S44.  $^{13}\text{C}$  NMR of Compound 16.

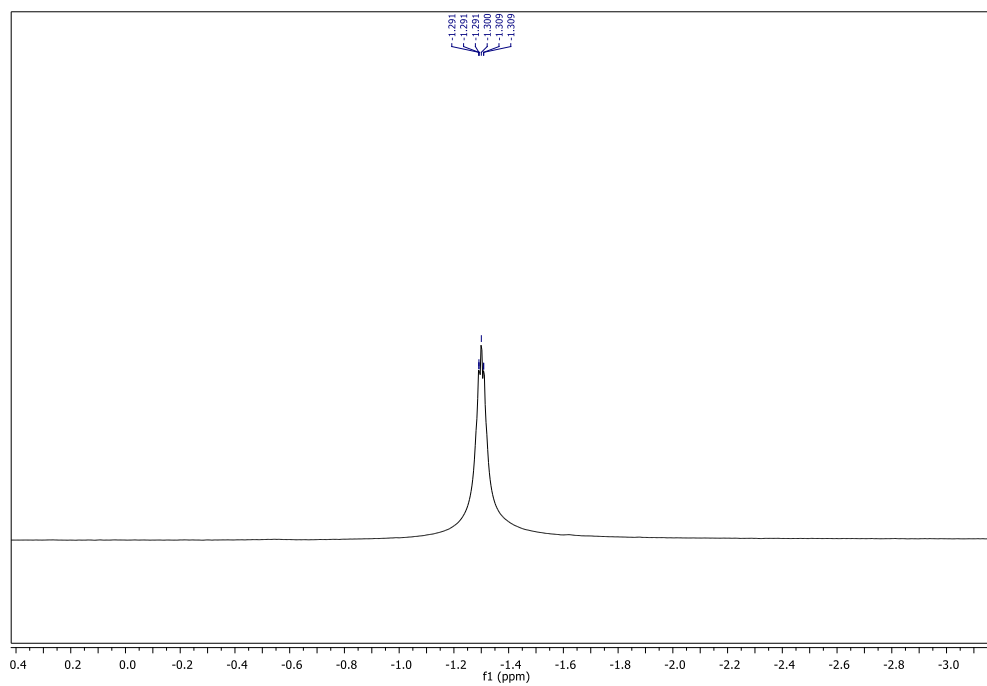

**Figure S45.**  $^{11}\text{B}$  NMR of Compound 16.

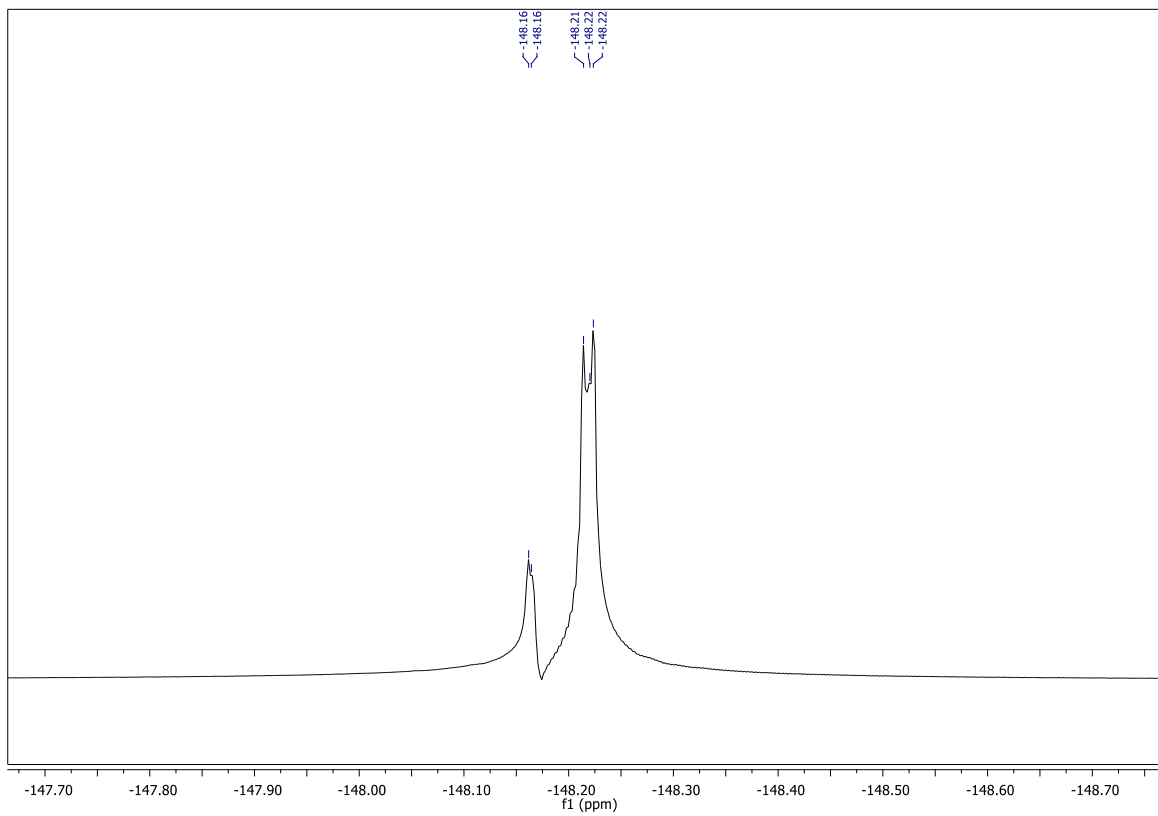

Figure S46.  $^{19}\text{F}$ NMR of Compound 16.

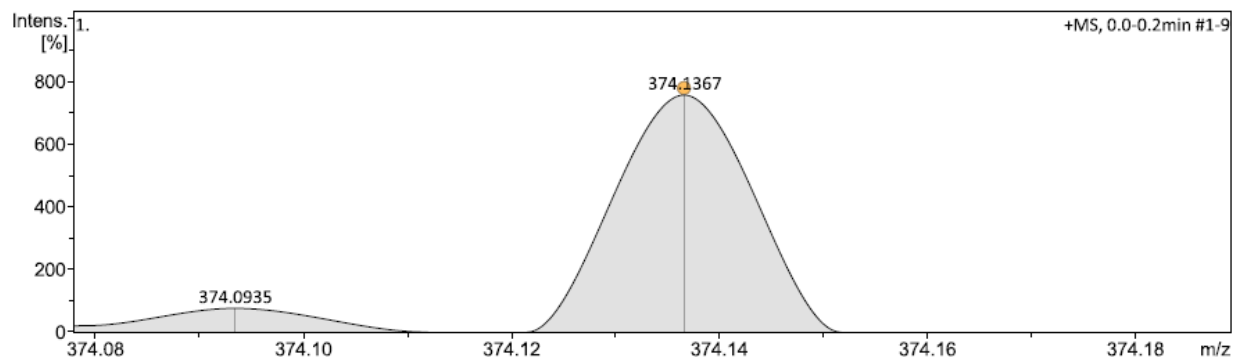

Figure S47. HRMS (ESI) of Compound 16.

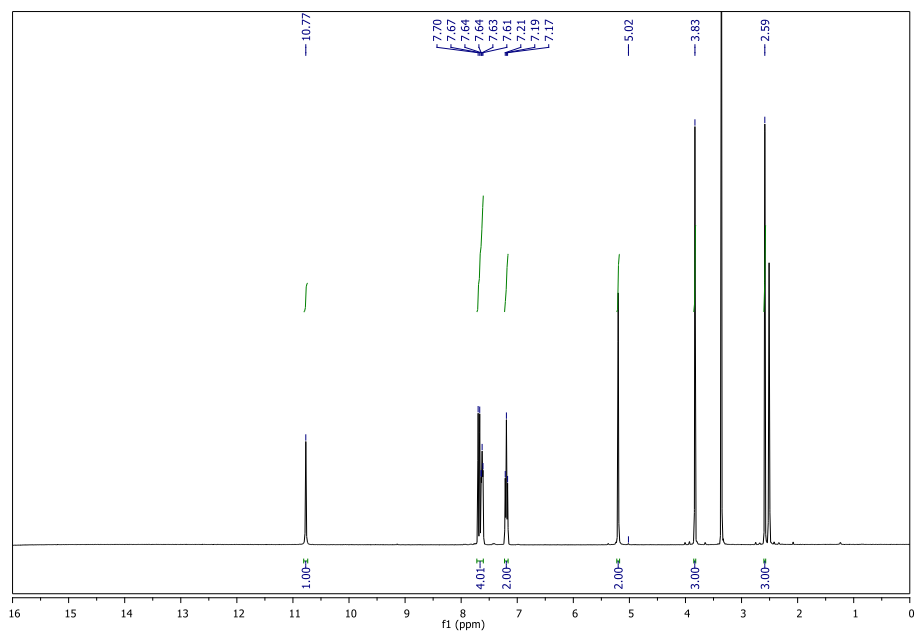

Figure S48. <sup>1</sup>H NMR of Compound 17.

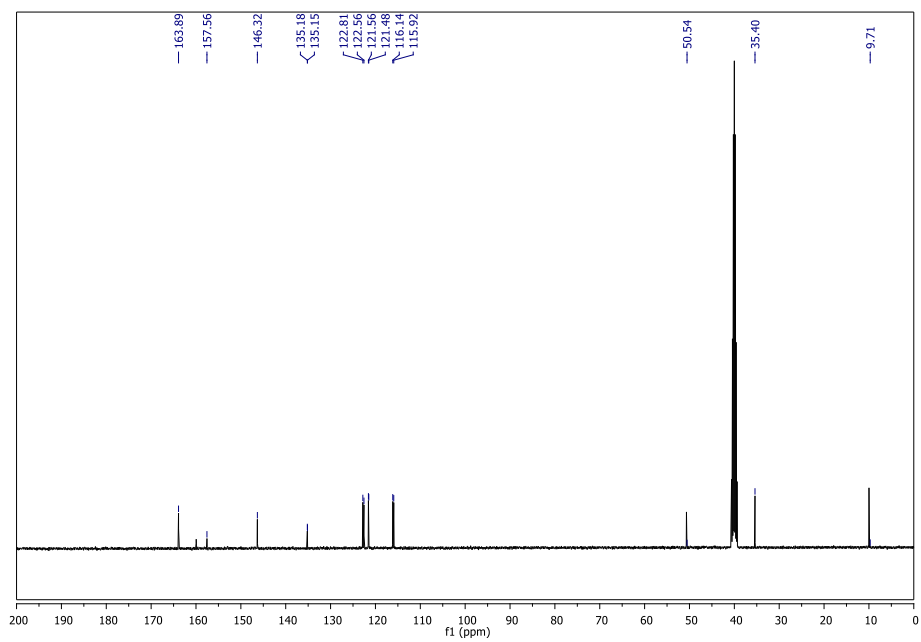

Figure S49. <sup>13</sup>C NMR of Compound 17.

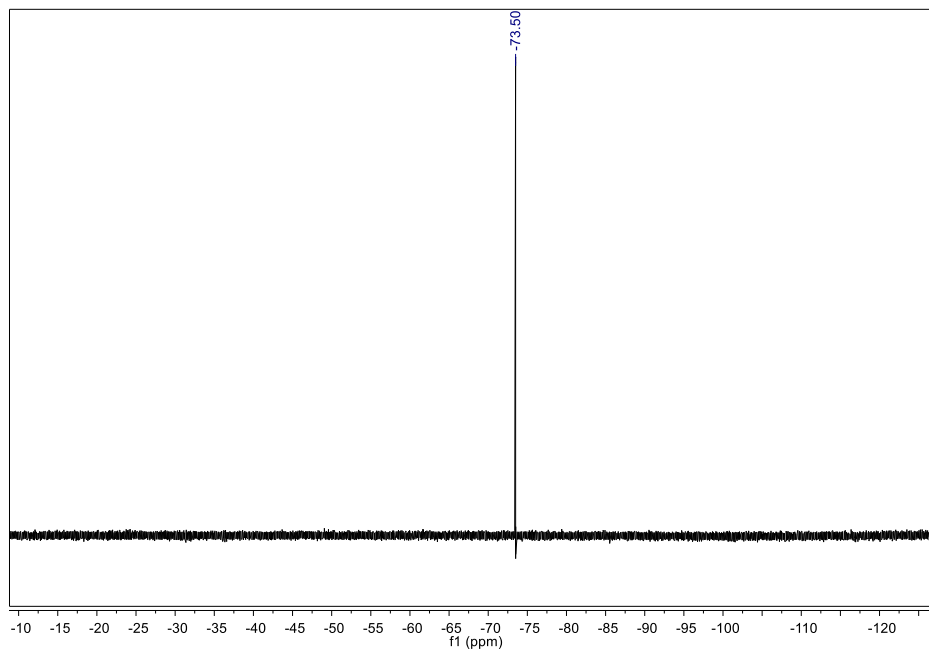

**Figure S50.**  $^{19}\text{F}$ NMR of Compound 17.

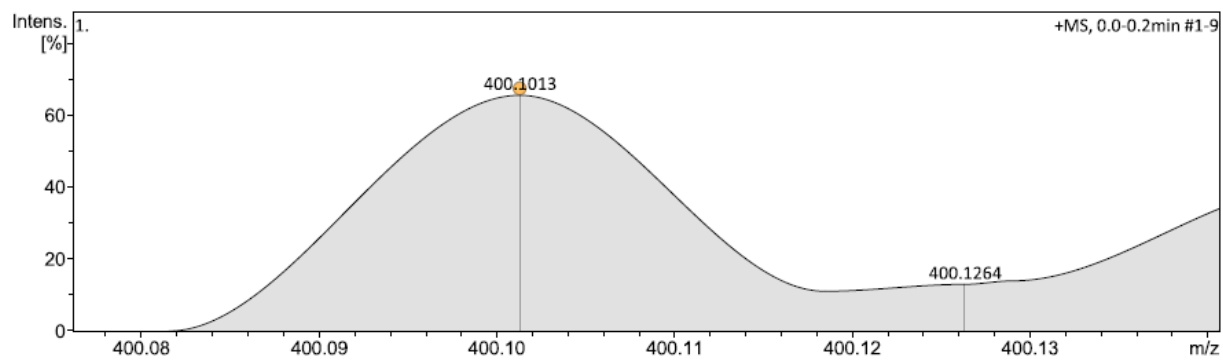

**Figure S51.** HRMS (ESI) of Compound 17.

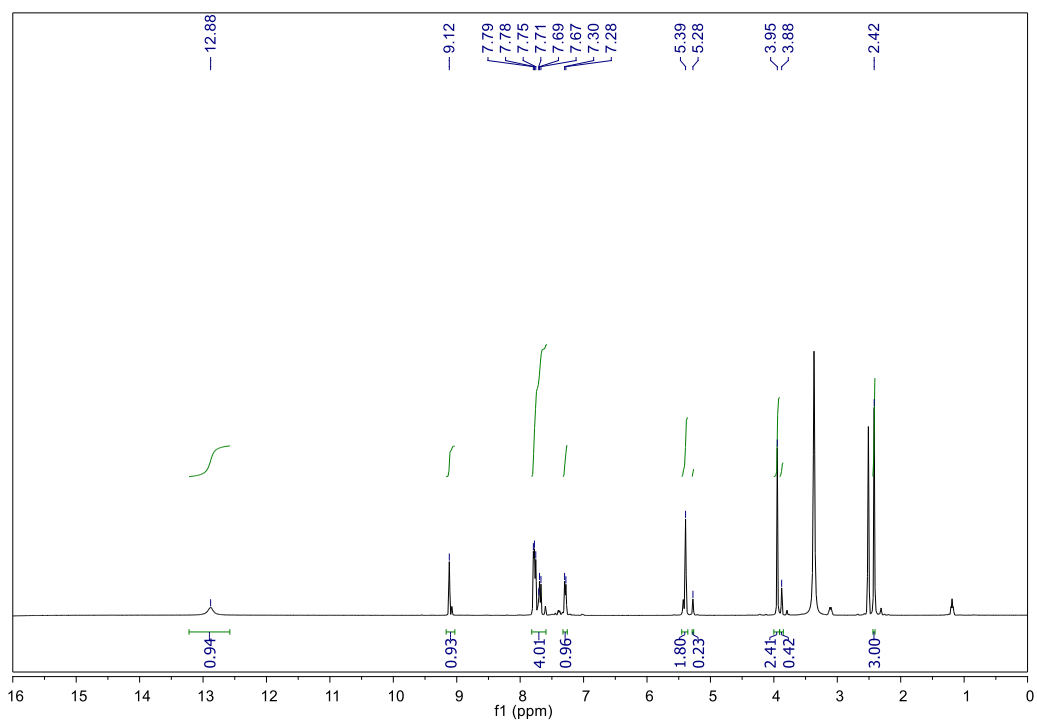

Figure S52.  $^1\text{H}$  NMR of Compound 18.

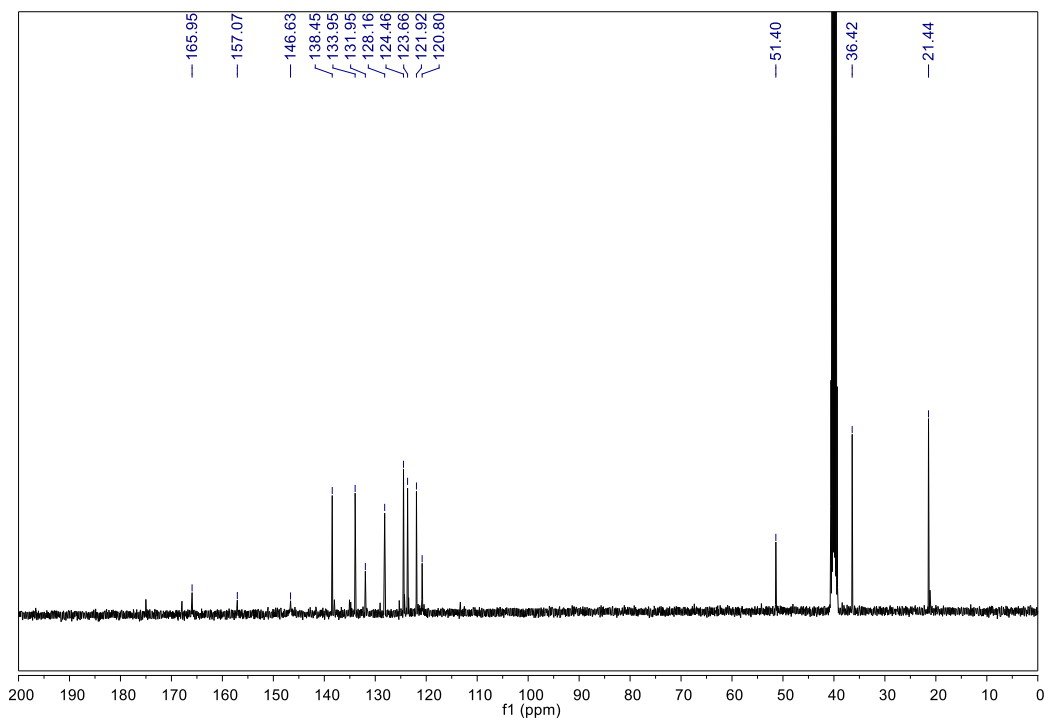

Figure S53.  $^{13}\text{C}$  NMR of Compound 18.

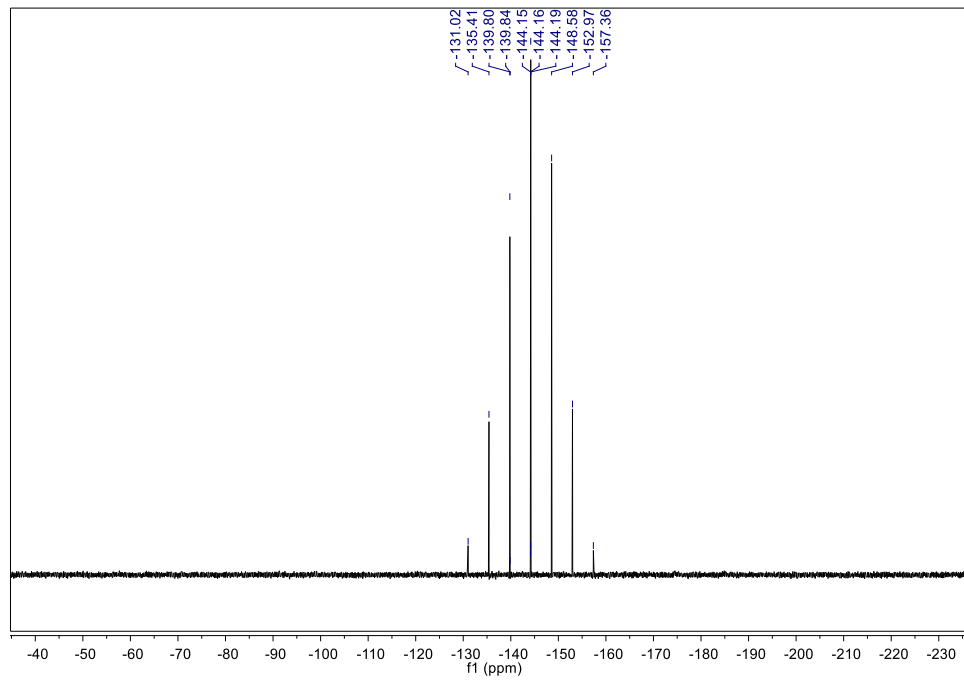

**Figure S54.**  $^{31}\text{P}$  NMR of Compound 18.

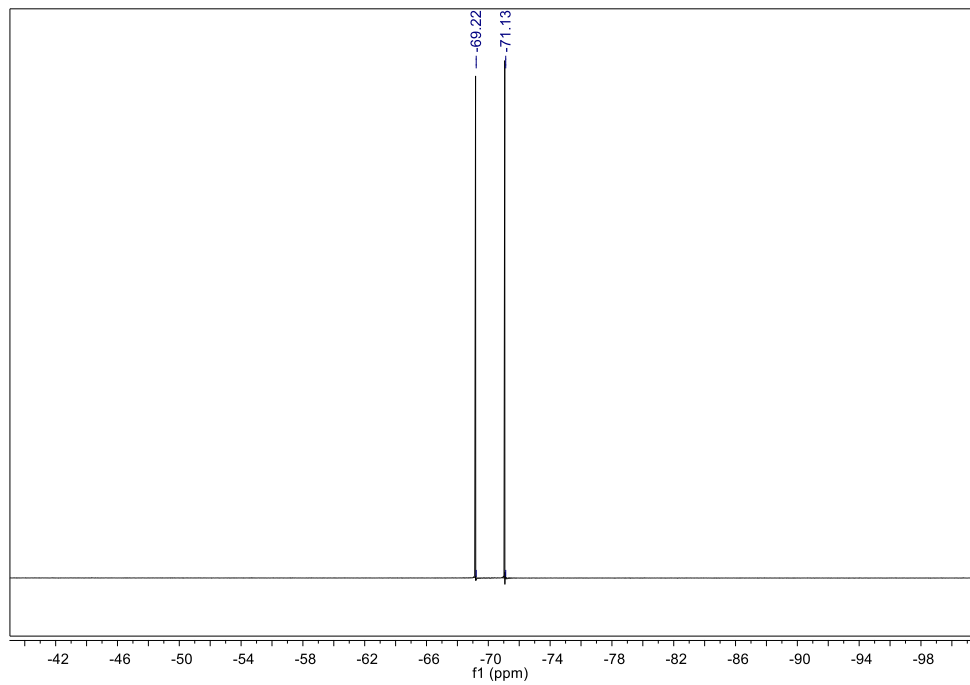

**Figure S55.**  $^{19}\text{F}$  NMR of Compound 18.

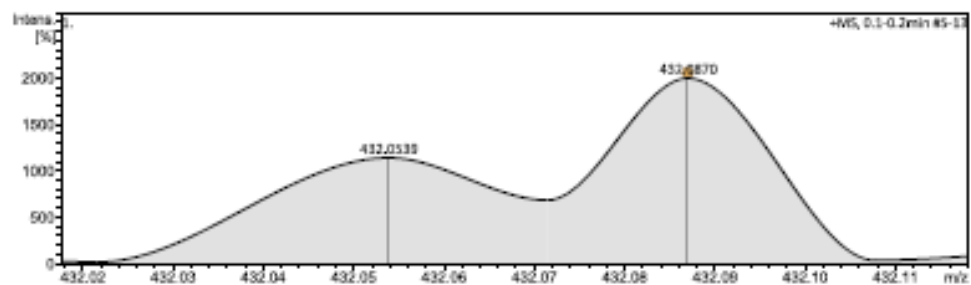

**Figure S56.** HRMS (ESI) of Compound **18**.



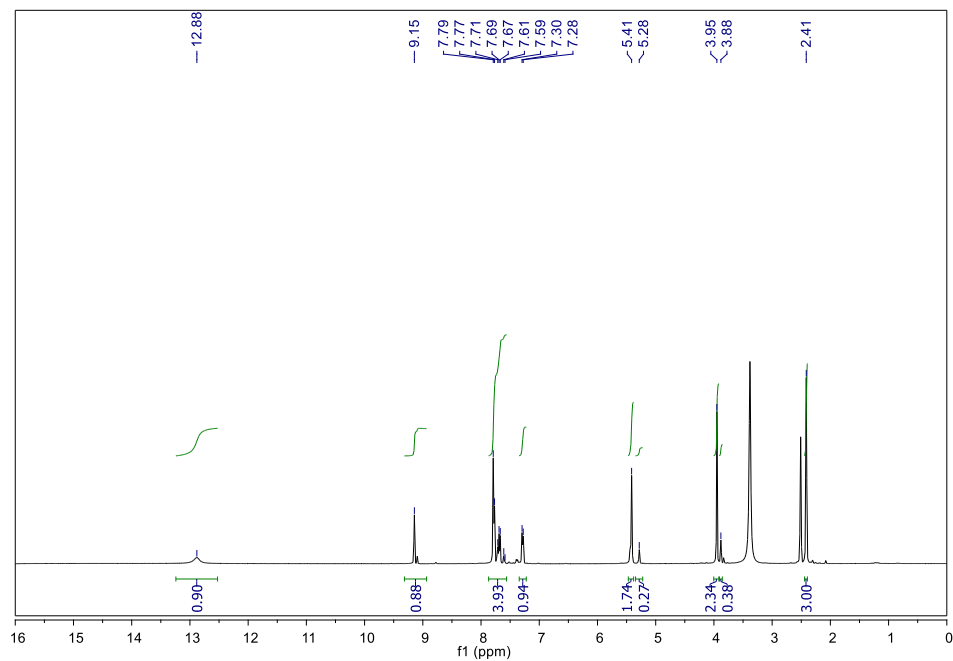

Figure S57.  $^1\text{H}$  NMR of Compound 19.

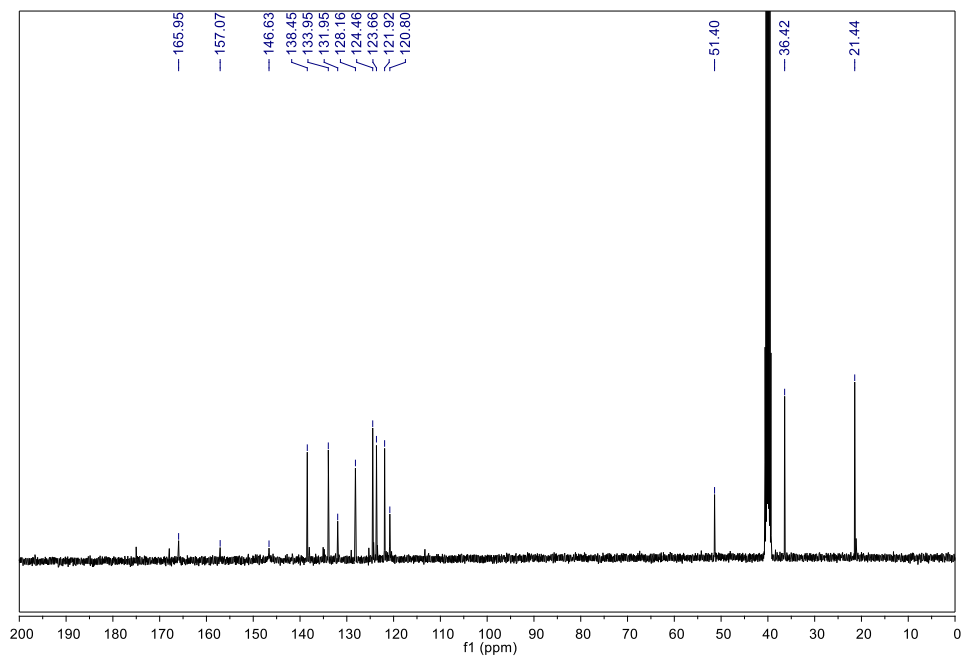

Figure S58.  $^{13}\text{C}$  NMR of Compound 19.

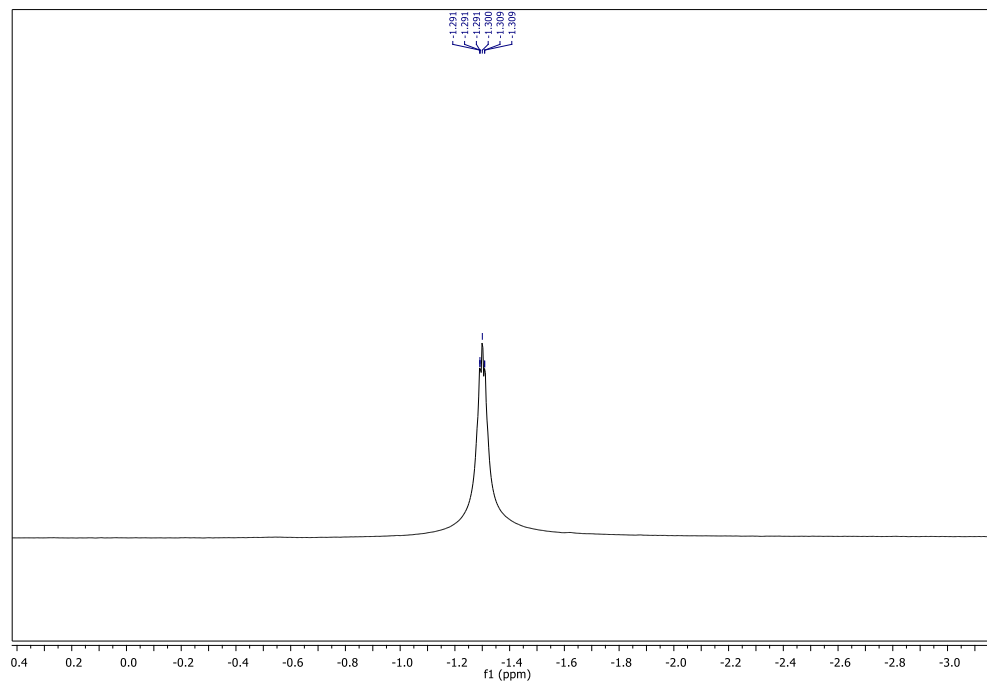

**Figure S59.**  $^{11}\text{B}$  NMR of Compound 19.

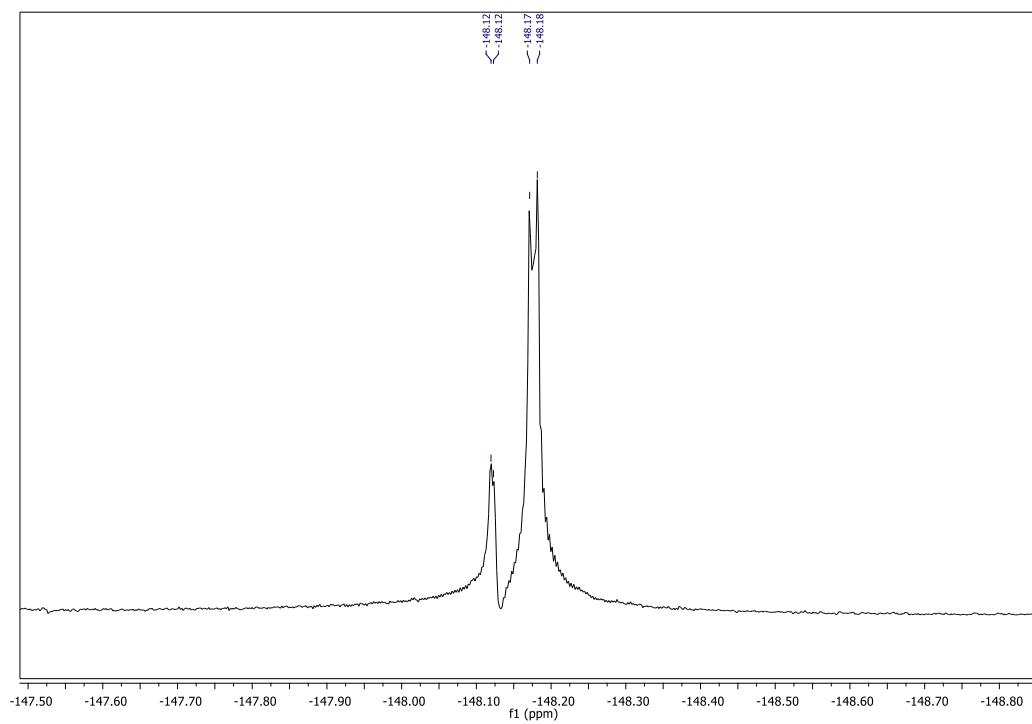

**Figure S60.**  $^{19}\text{F}$  NMR of Compound 19.

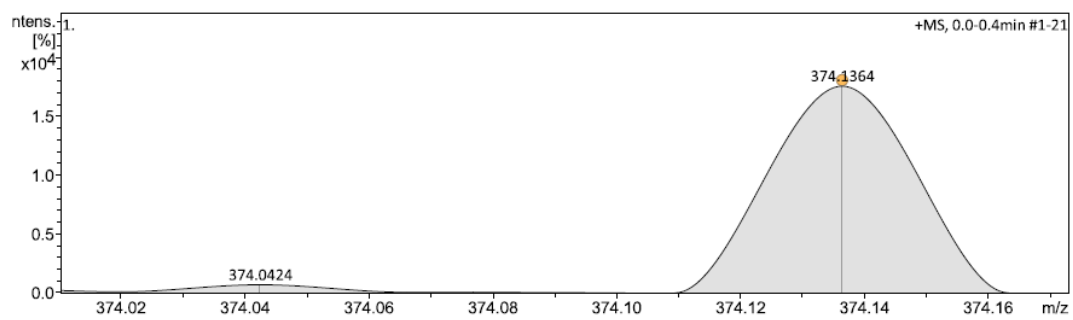

**Figure S61.** HRMS (ESI) of Compound **19**.

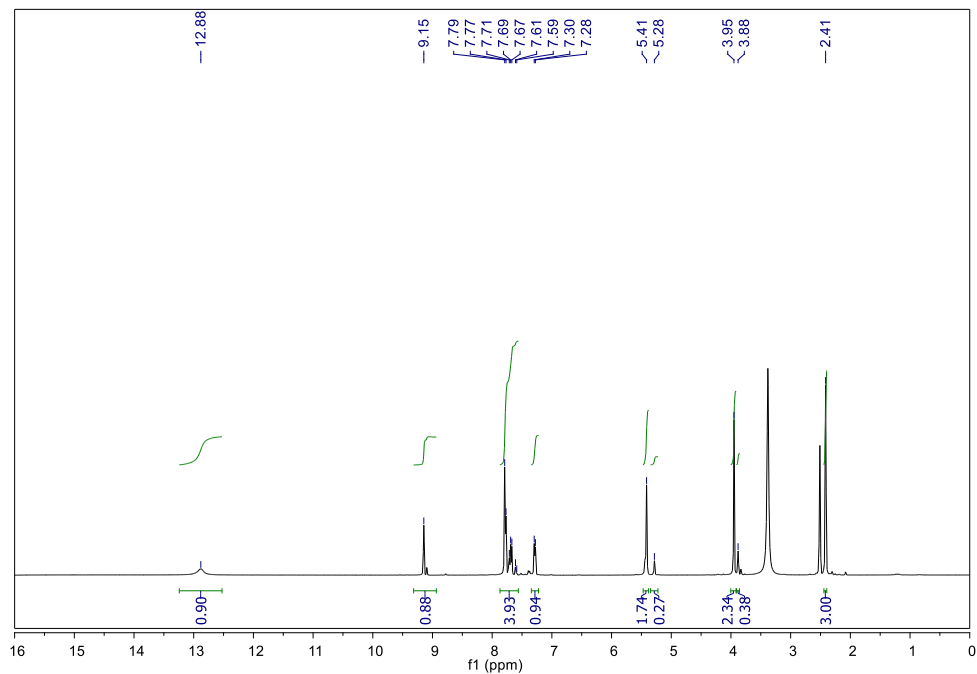

Figure S62.  $^1\text{H}$  NMR of Compound 20.

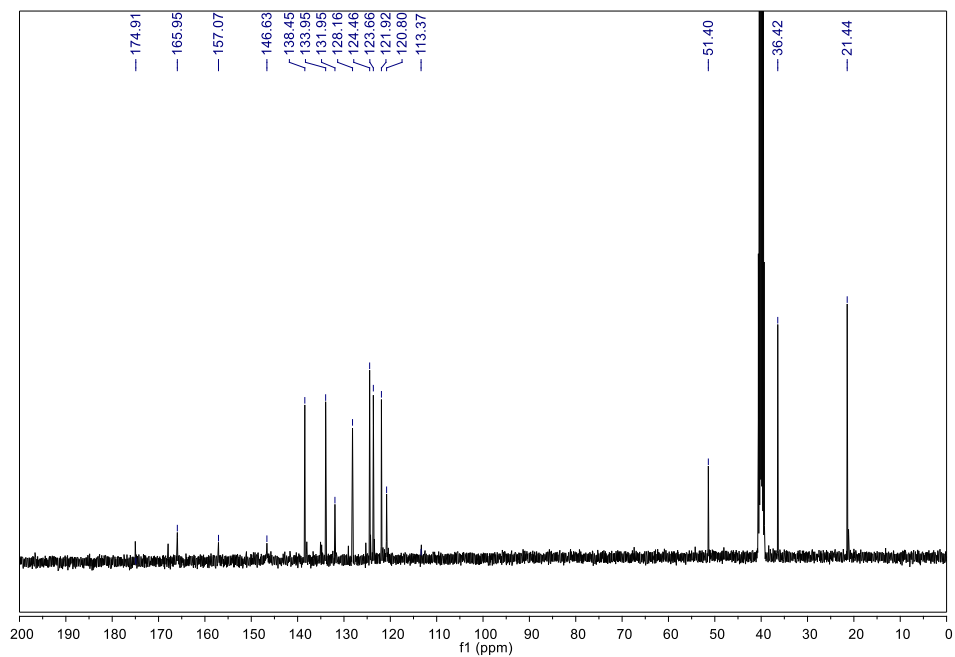

Figure S63.  $^{13}\text{C}$  NMR of Compound 20.

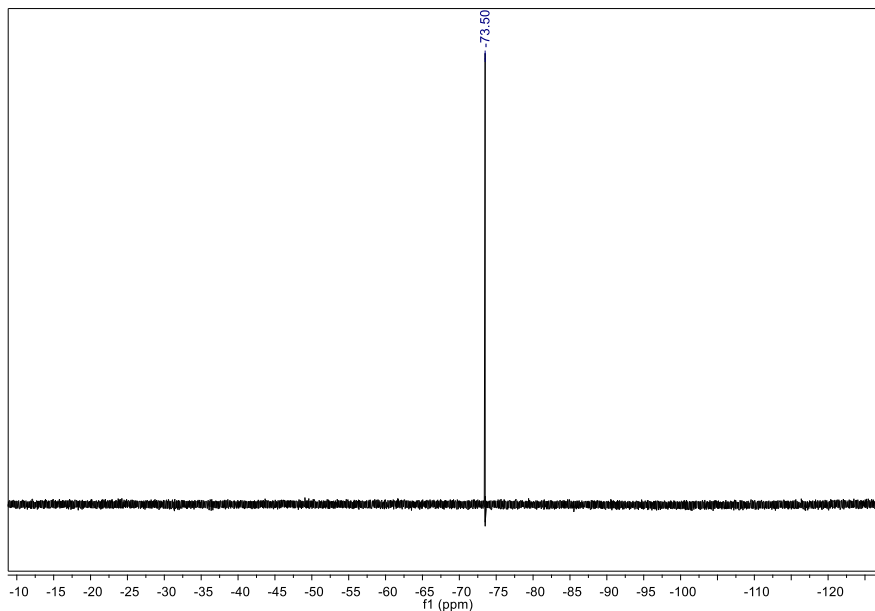

**Figure S64.**  $^{19}\text{F}$  NMR of Compound **20**.

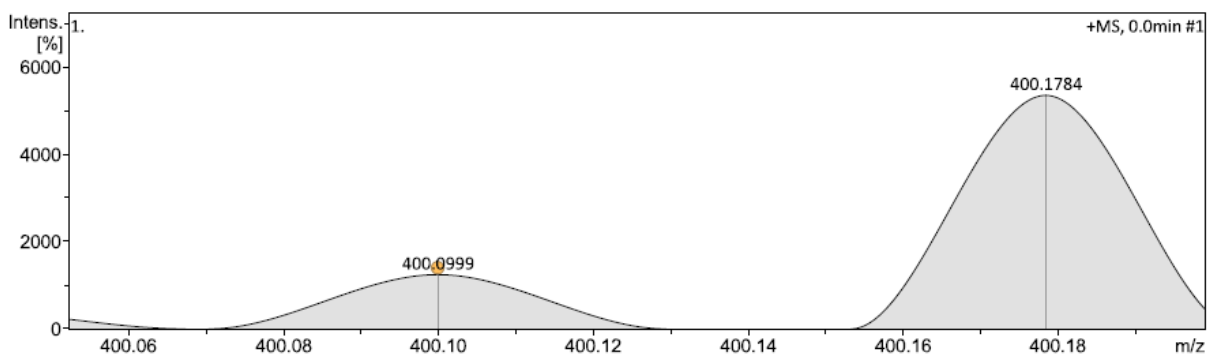

**Figure S65.** HRMS (ESI) of Compound **20**.

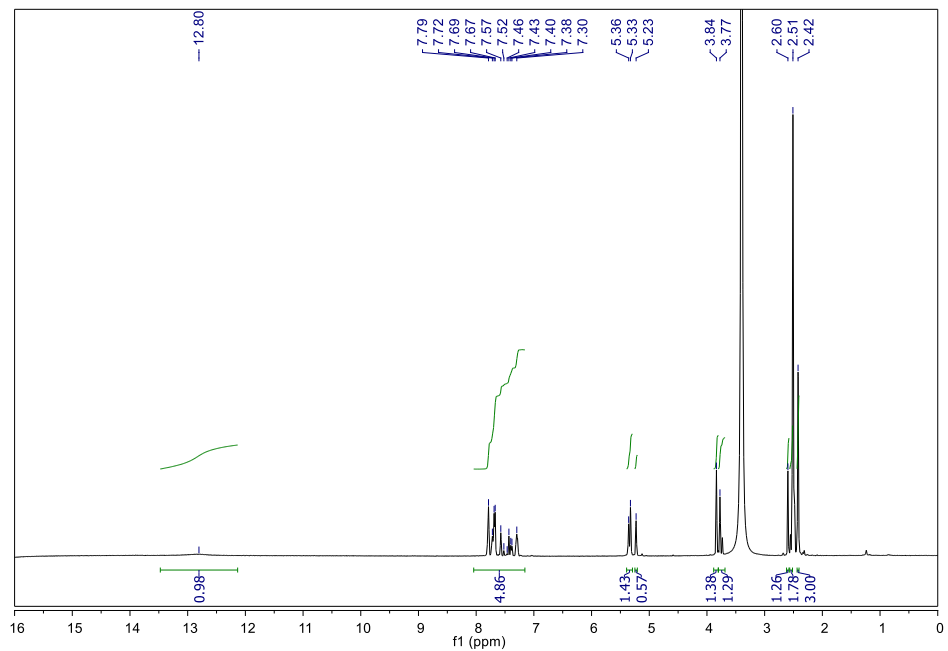

Figure S66.  $^1\text{H}$  NMR of Compound 21.

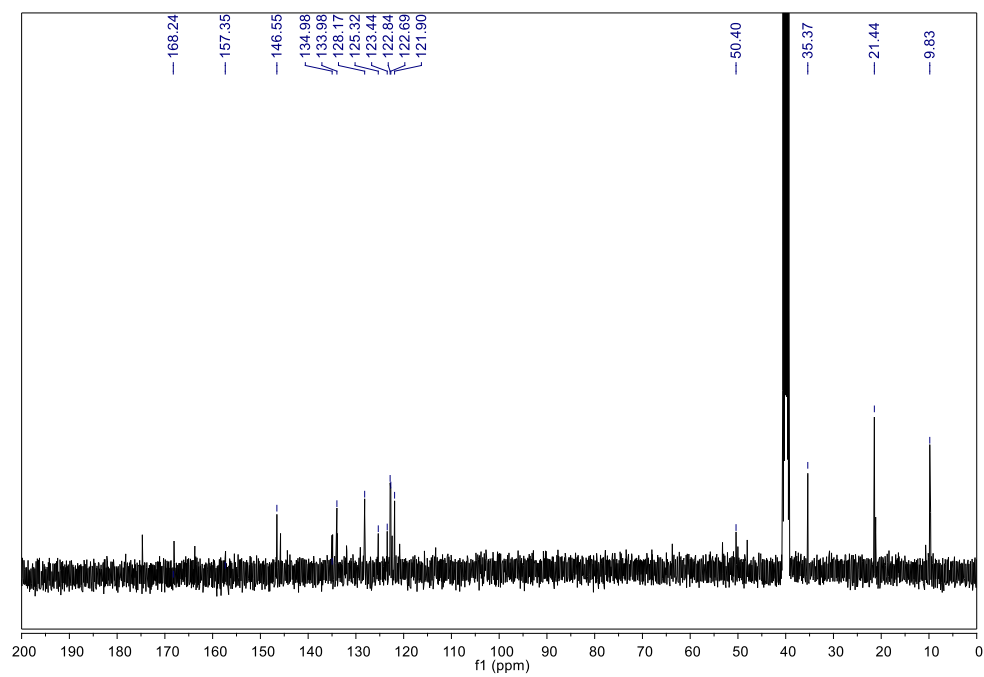

Figure S67.  $^{13}\text{C}$  NMR of Compound 21.

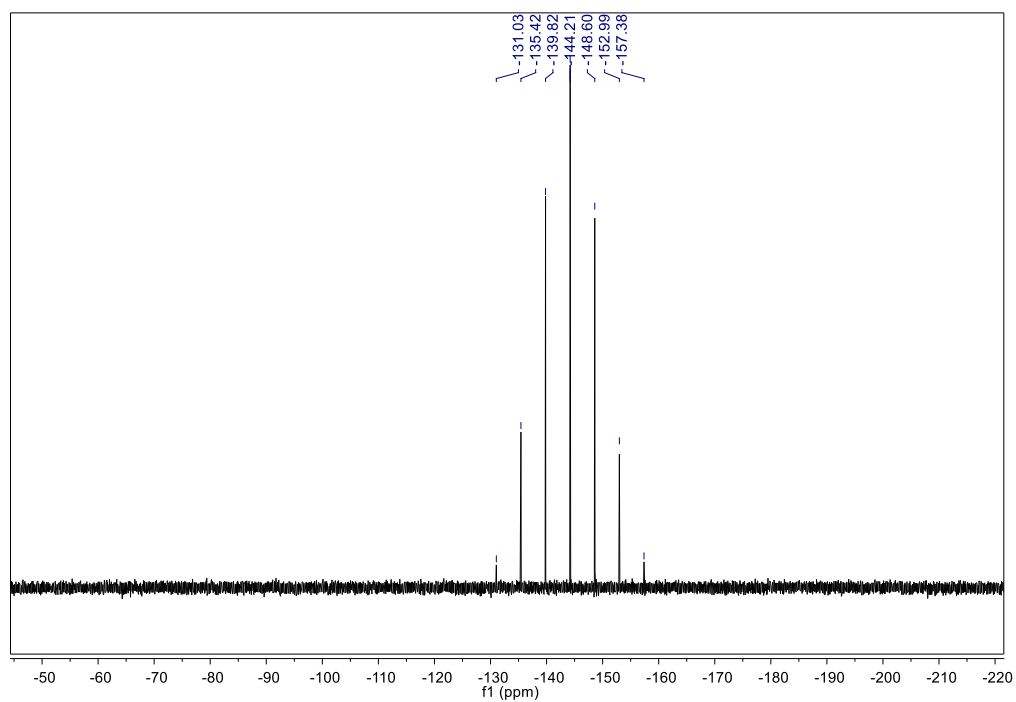

Figure S68.  $^{31}\text{P}$  NMR of Compound 21.

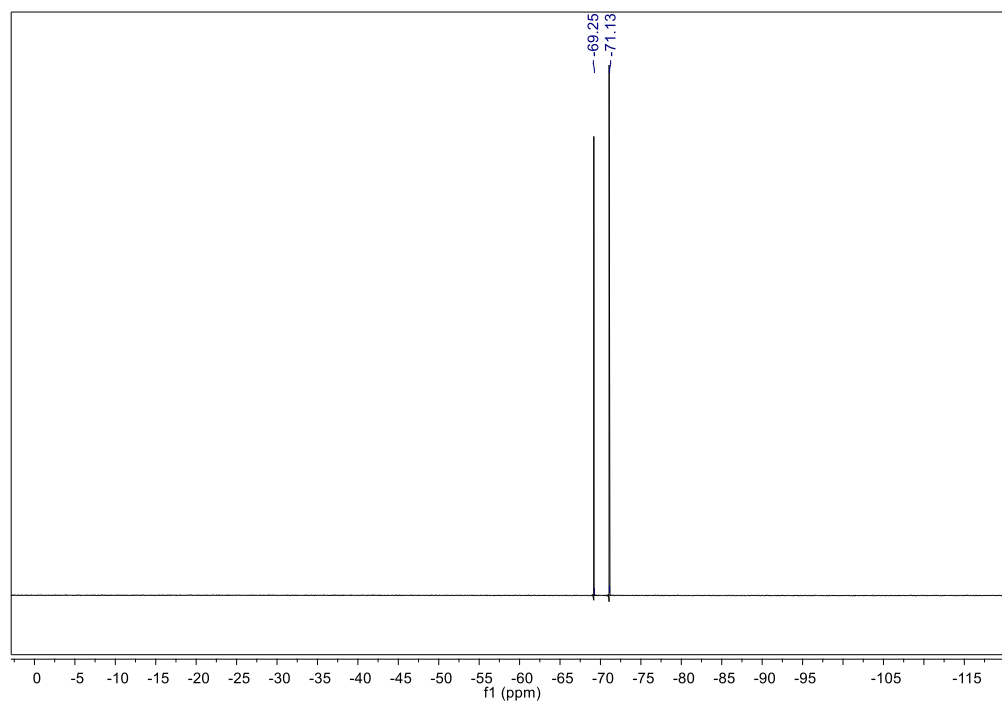

Figure S69.  $^{19}\text{F}$  NMR of Compound 21.

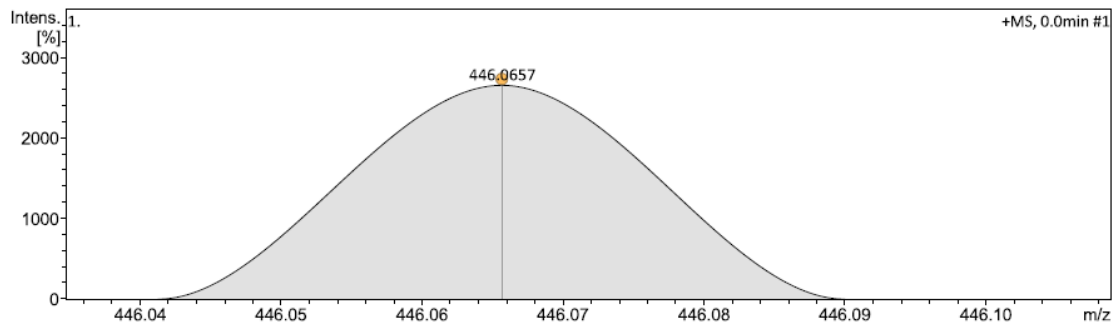

**Figure S70.** HRMS (ESI) of Compound **21**.



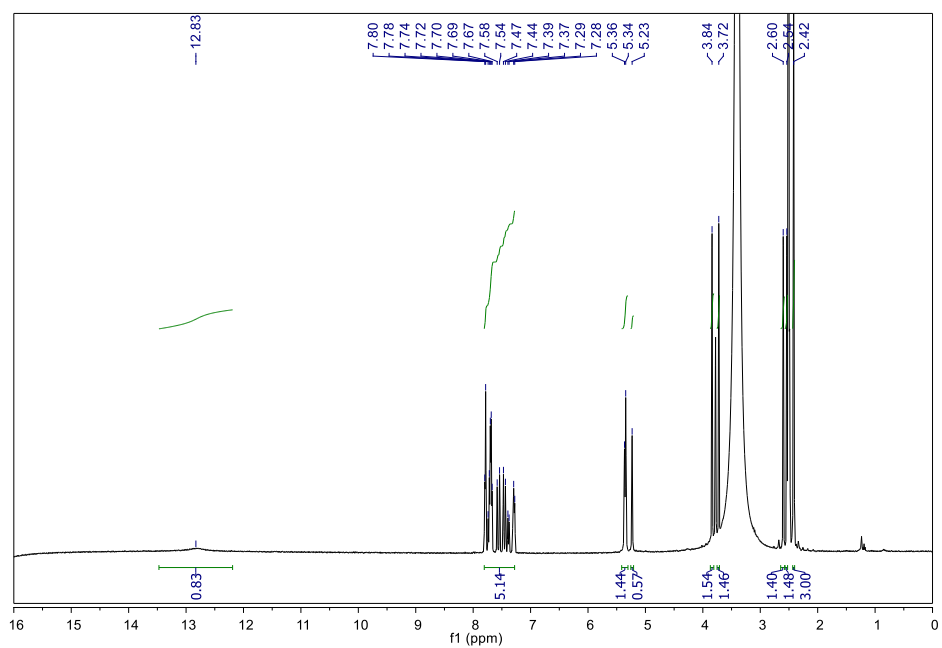

Figure S71.  $^1\text{H}$  NMR of Compound 22.

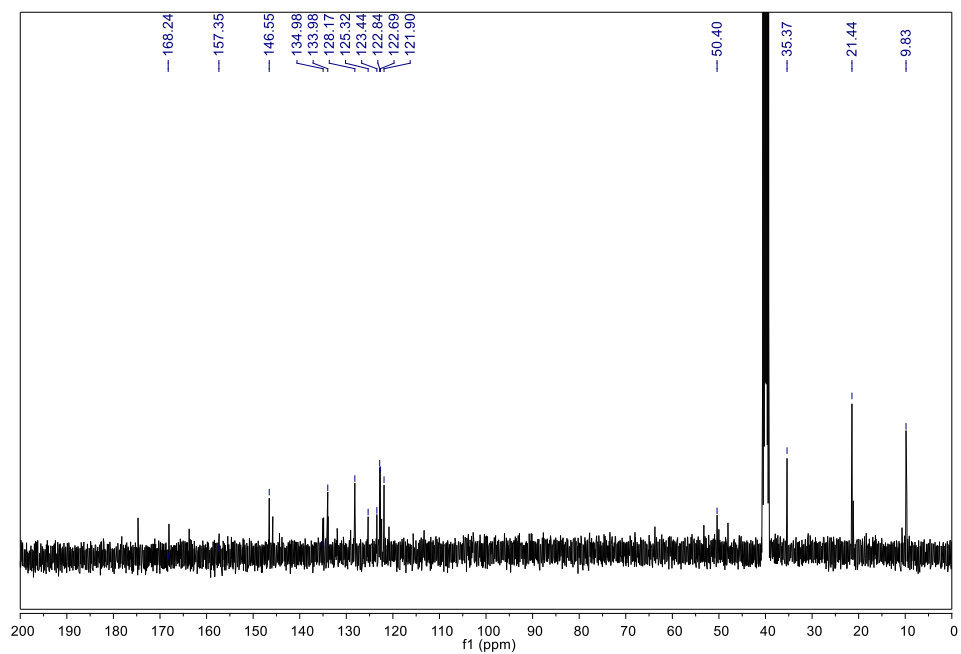

Figure S72.  $^{13}\text{C}$  NMR of Compound 22.

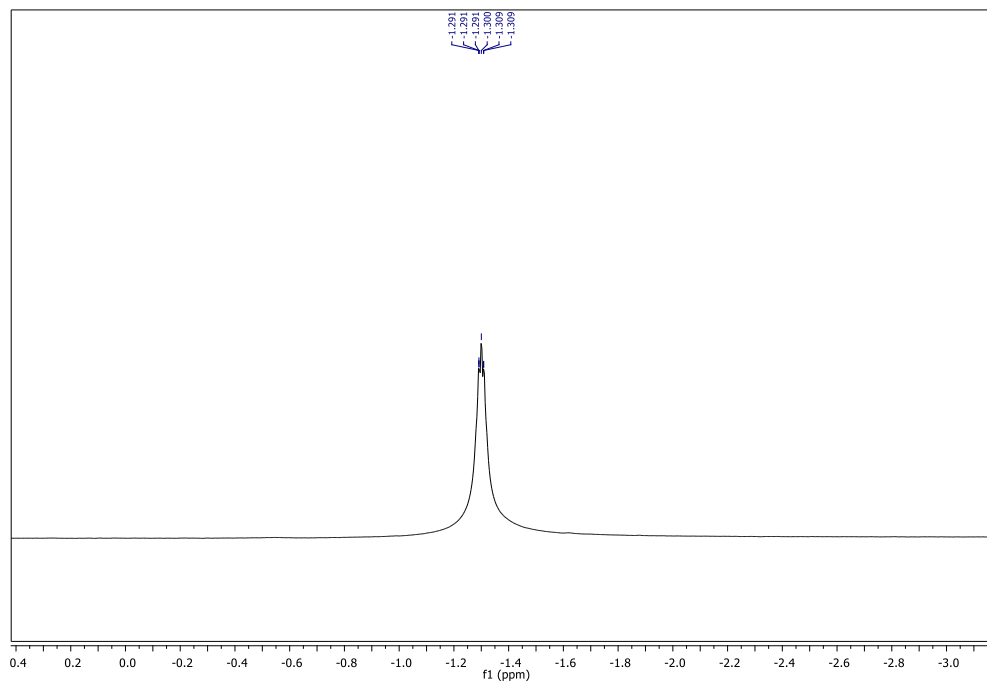

**Figure S73.**  $^{11}\text{B}$  NMR of Compound 22.

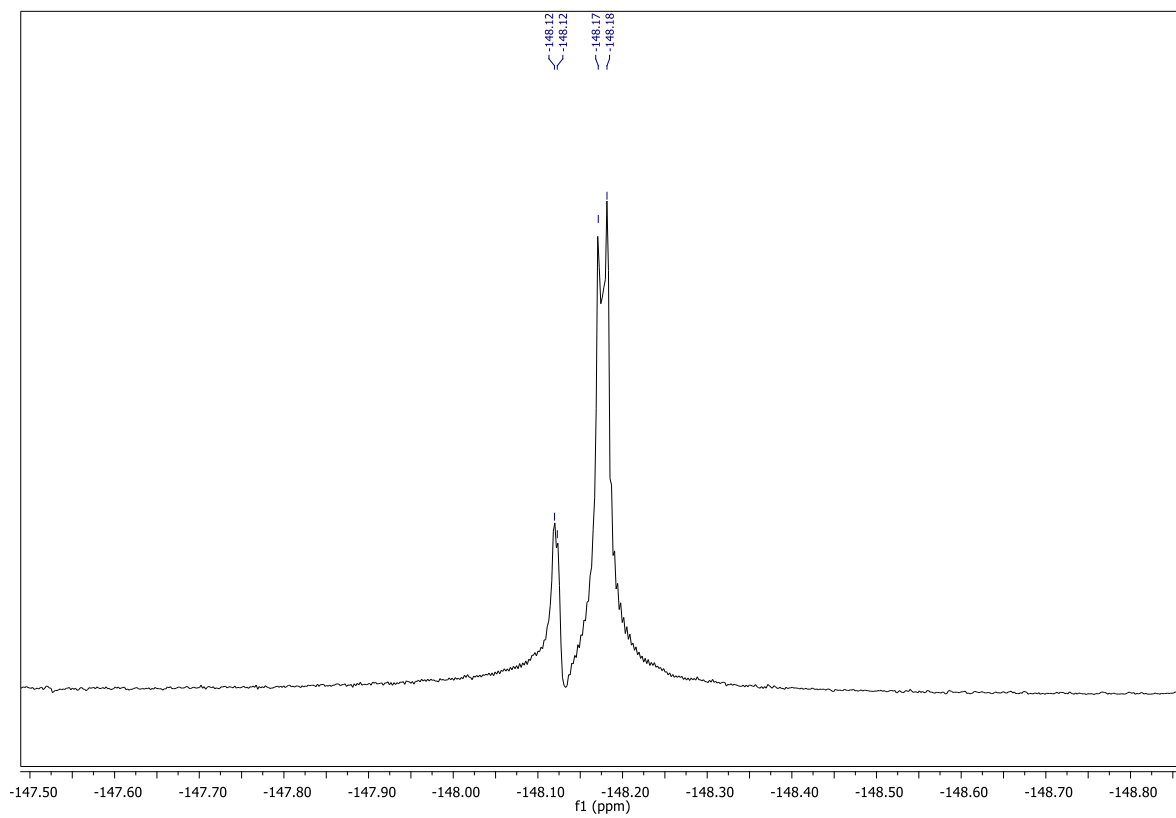

**Figure S74.**  $^{19}\text{F}$  NMR of Compound 22.

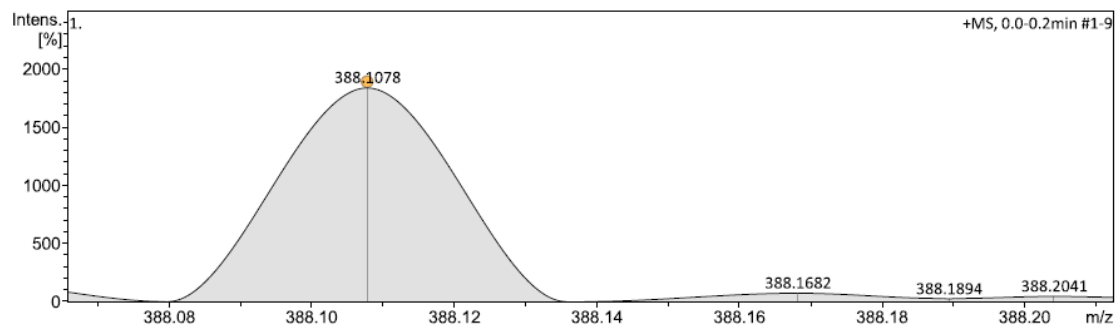

**Figure S75.** HRMS (ESI) of Compound 22.

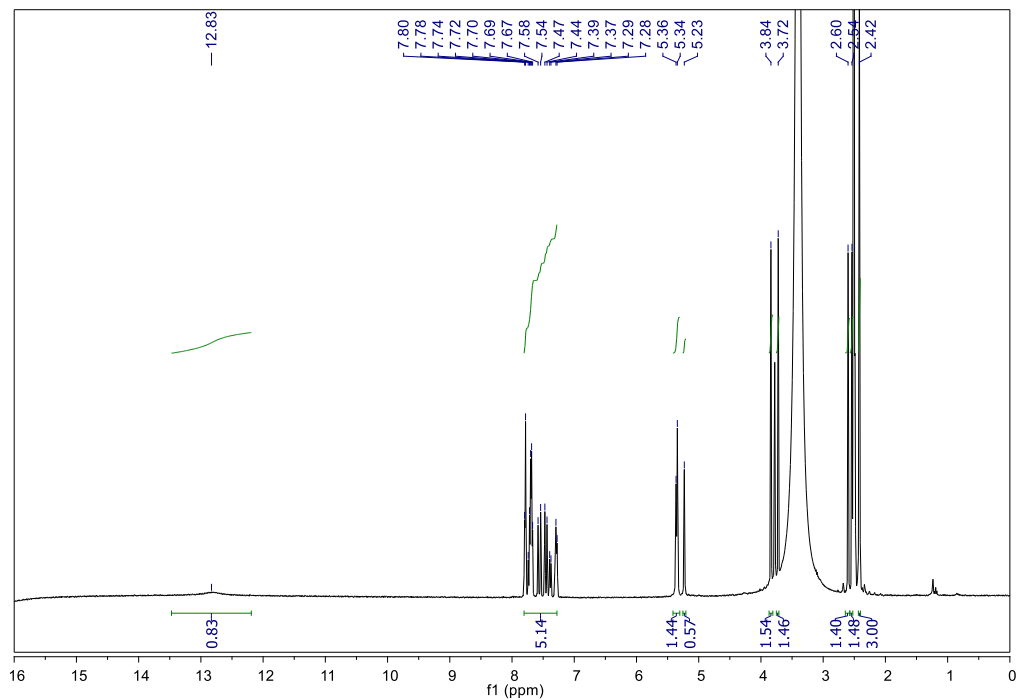

Figure S76.  $^1\text{H}$  NMR of Compound 23.

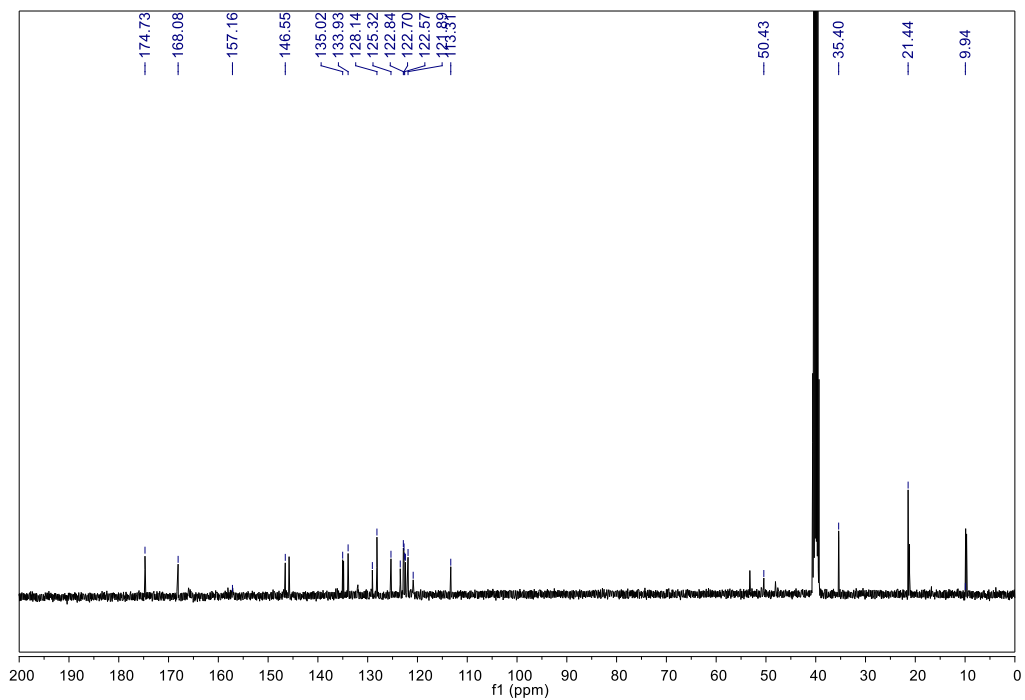

Figure S77.  $^{13}\text{C}$  NMR of Compound 23.

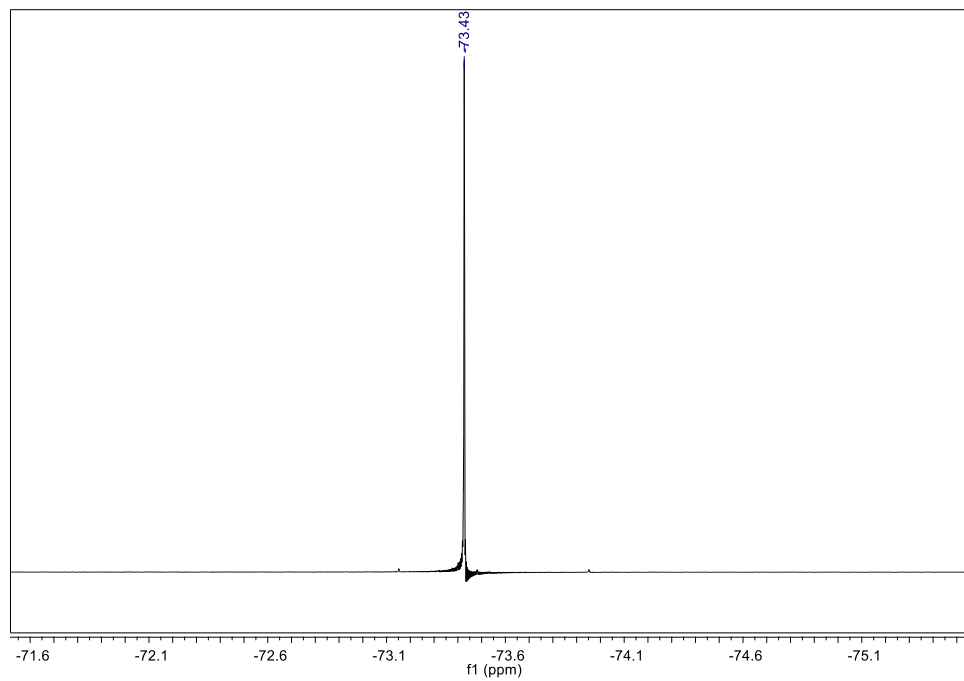

**Figure S78.**  $^{19}\text{F}$  NMR of Compound 23.

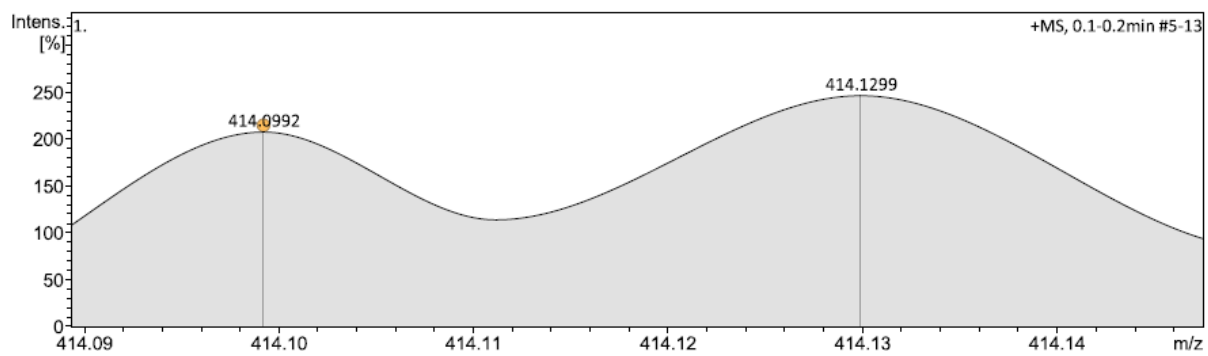

**Figure S79.** HRMS (ESI) of Compound 23.

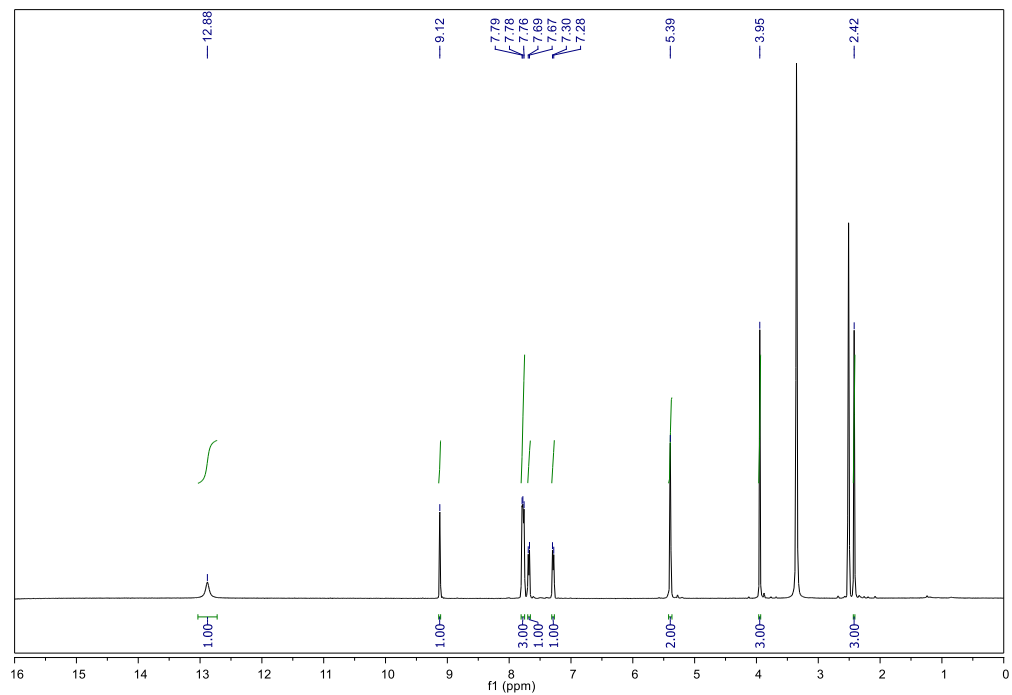

Figure S80.  $^1\text{H}$  NMR of Compound 24.

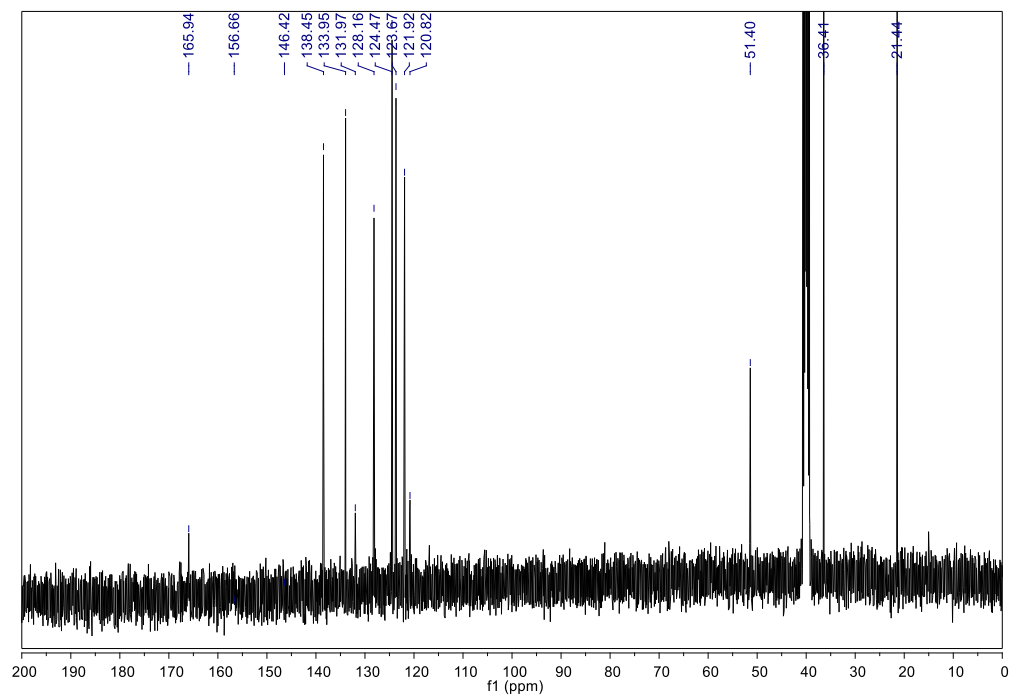

Figure S81.  $^{13}\text{C}$  NMR of Compound 24.

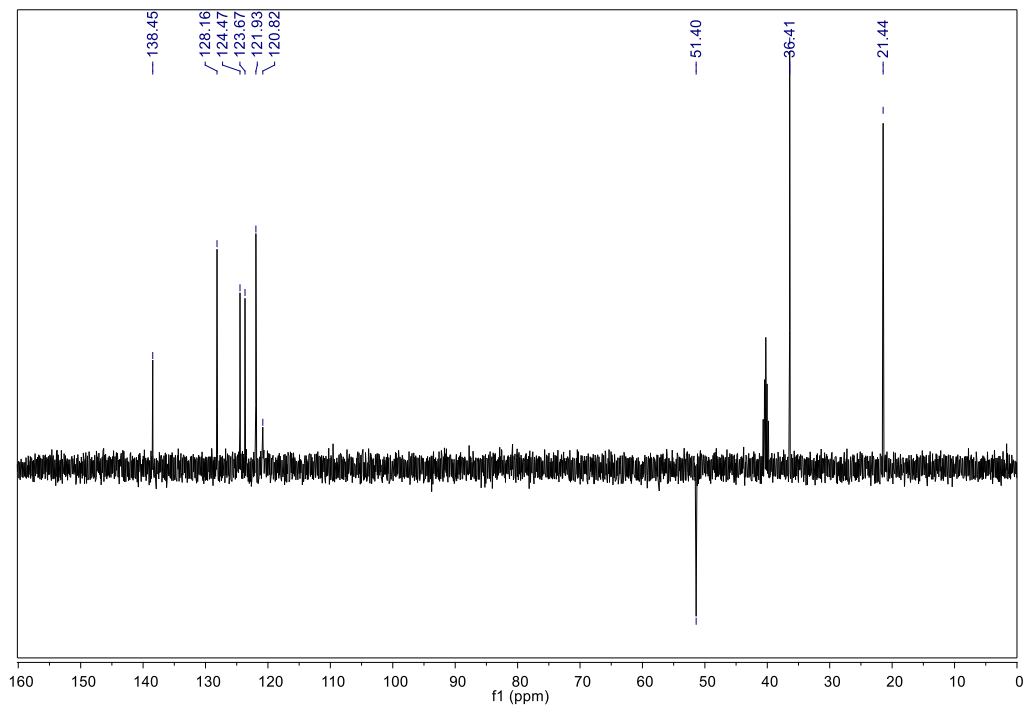

Figure S82. Dept-135 NMR of Compound 24.

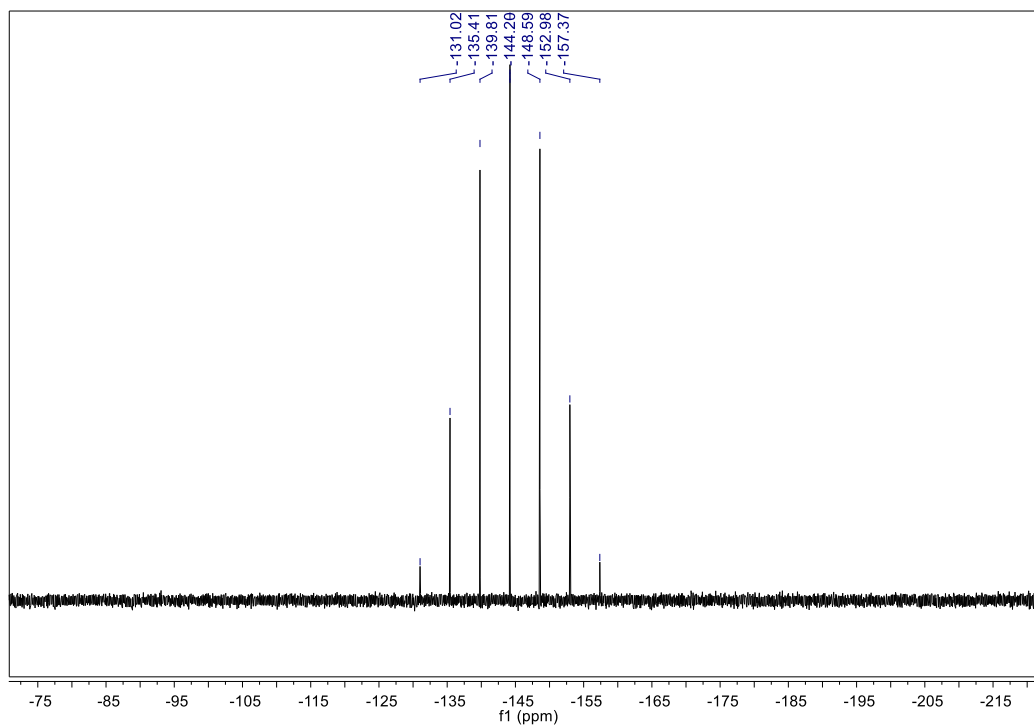

Figure S83.  $^{31}\text{P}$  NMR of Compound 24.

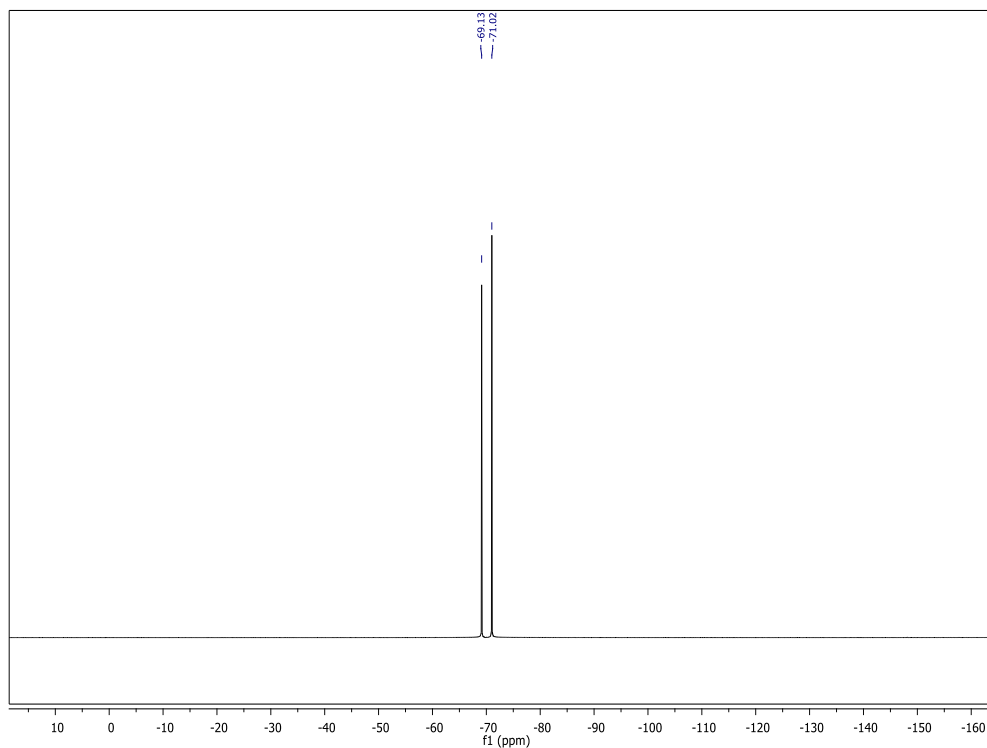

**Figure S84.**  $^{19}\text{F}$  NMR of Compound **24**.

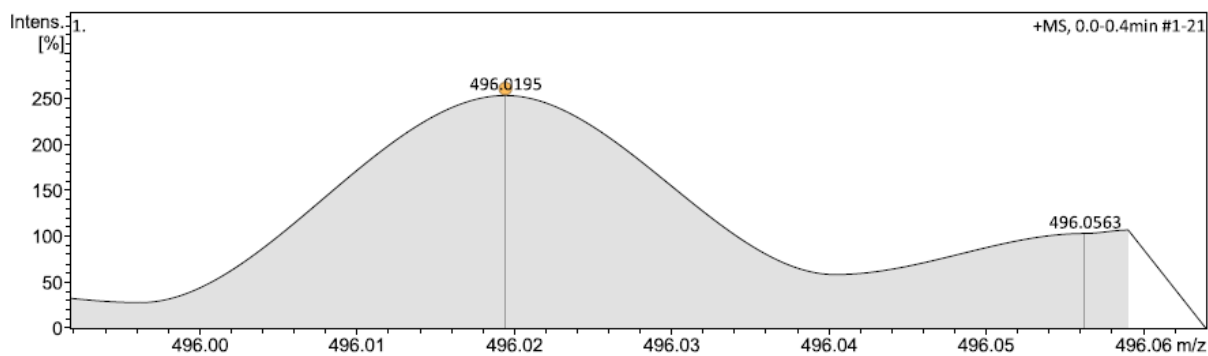

**Figure S85.** HRMS (ESI) of Compound **24**.



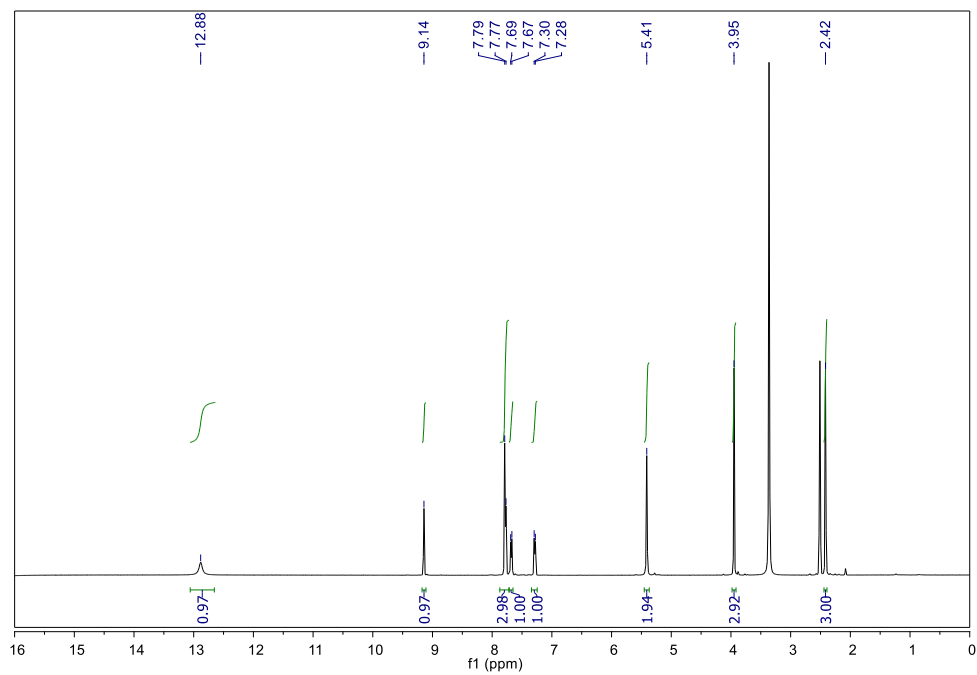

Figure S86.  $^1\text{H}$  NMR of Compound 25.

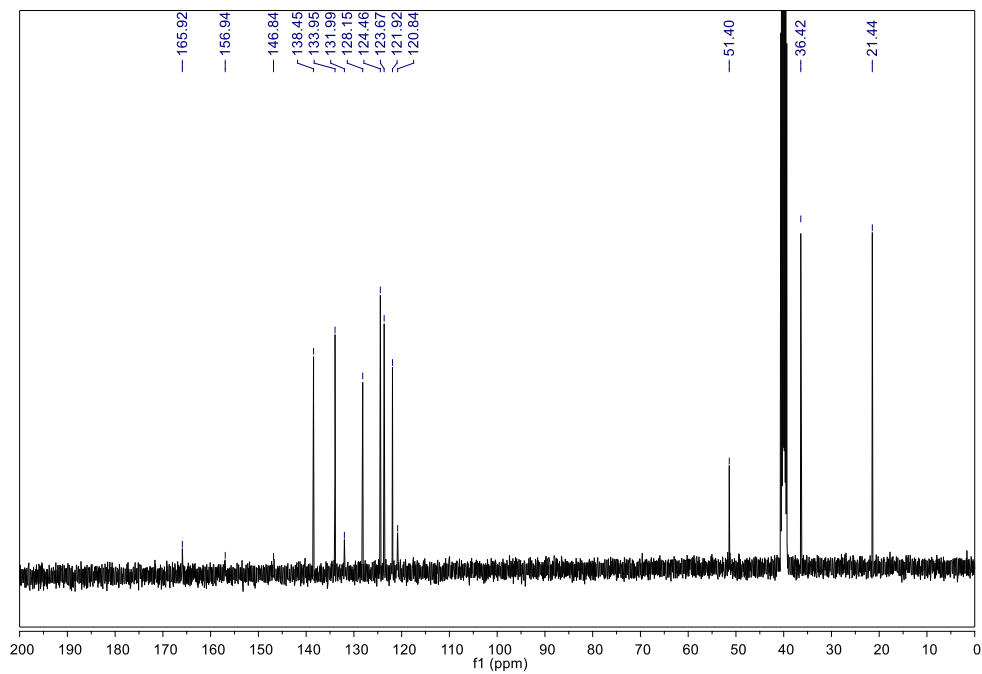

Figure S87.  $^{13}\text{C}$  NMR of Compound 25.

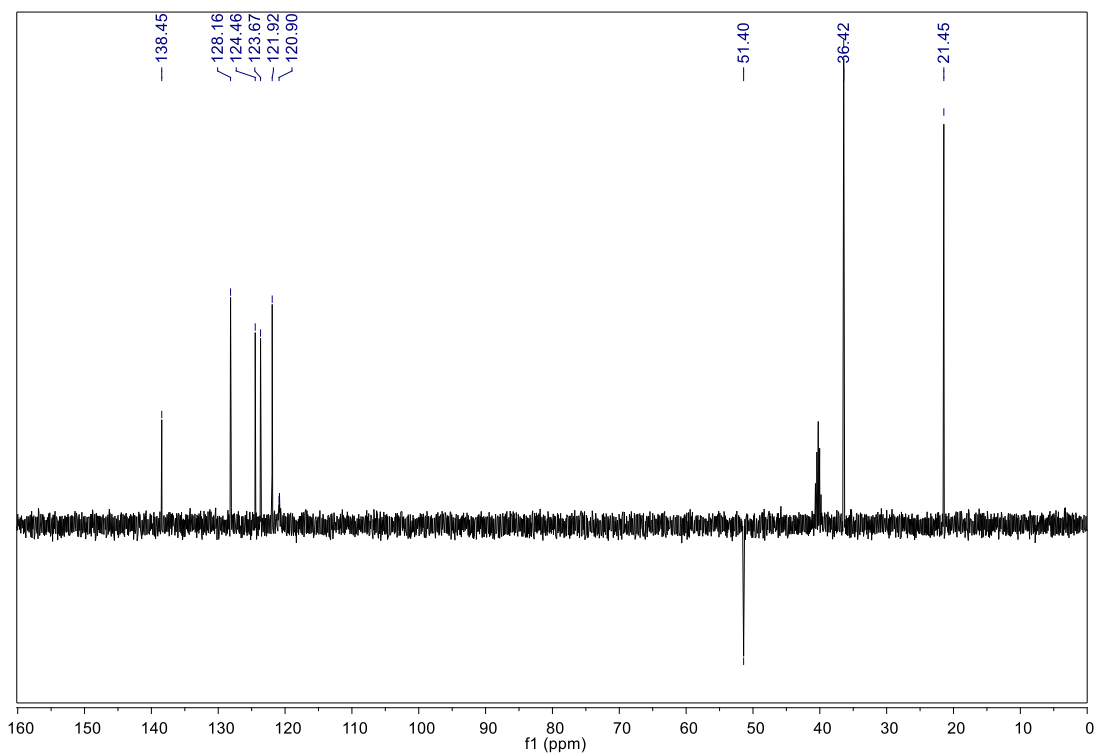

Figure S88. Dept-135 NMR of Compound 25.

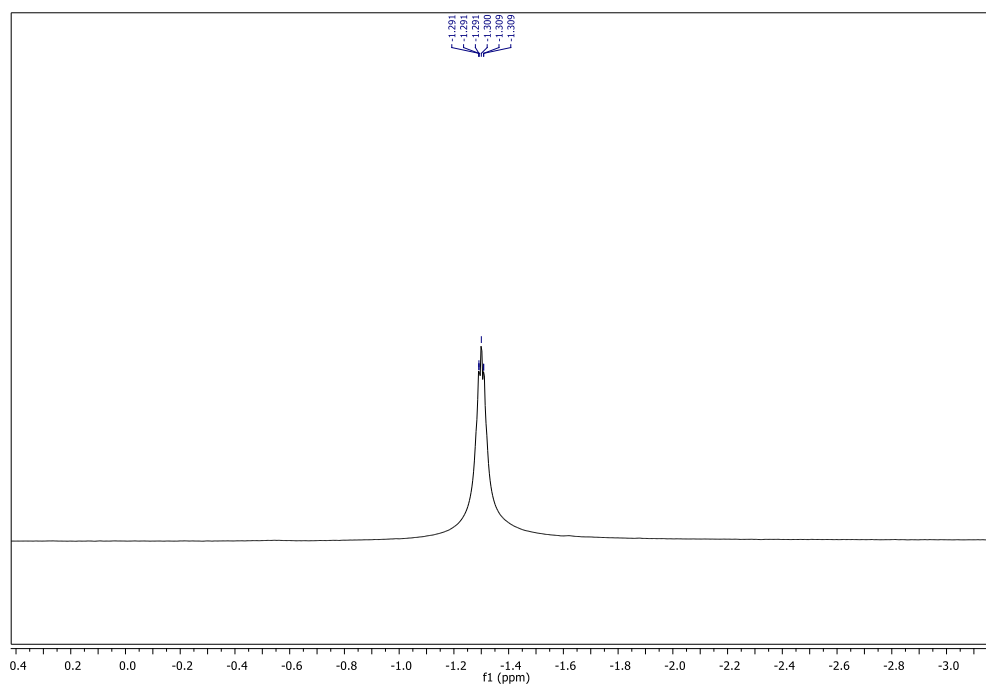

Figure S89. <sup>11</sup>B NMR of Compound 25.

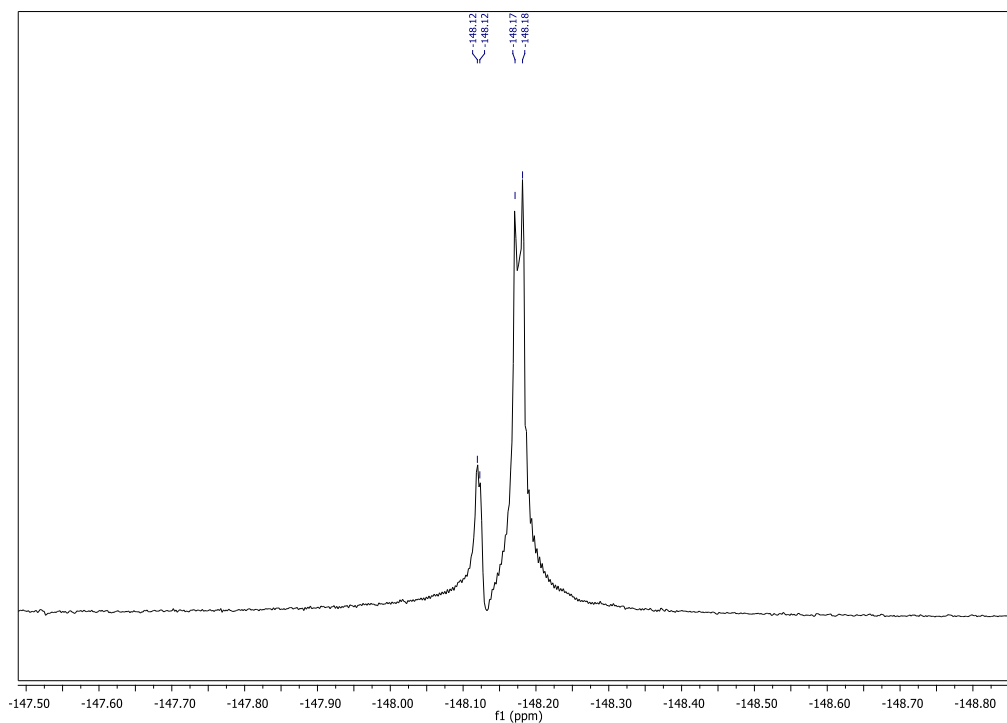

Figure S90.  $^{19}\text{F}$  NMR of Compound 25.

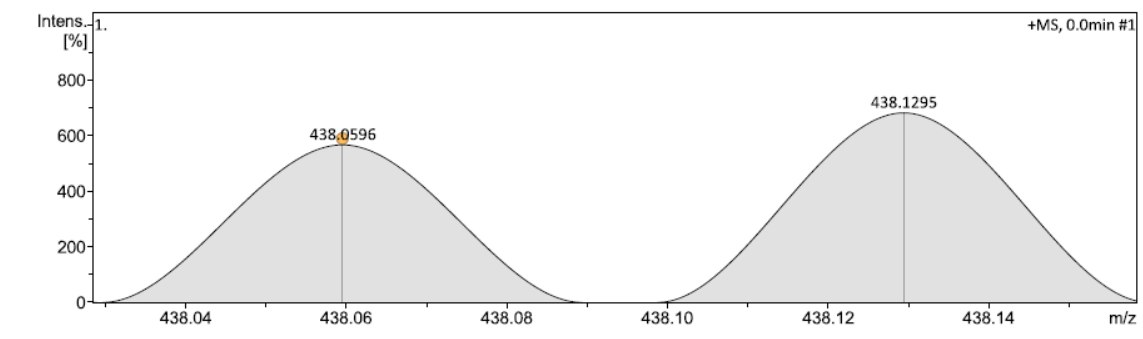

Figure S91. HRMS (ESI) of Compound 25.

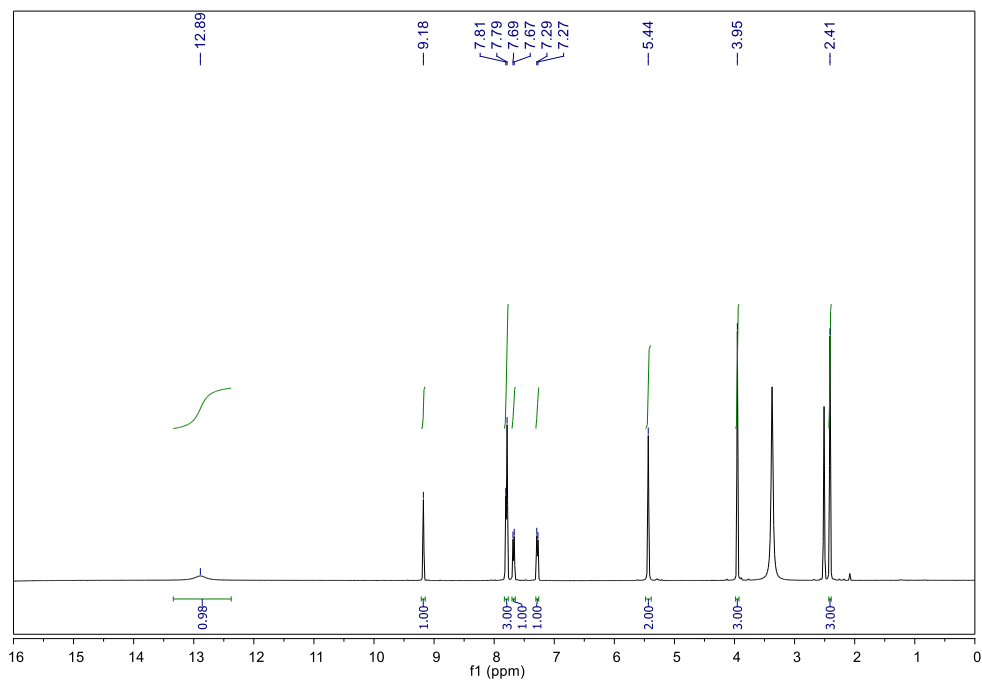

Figure S92.  $^1\text{H}$  NMR of Compound 26.

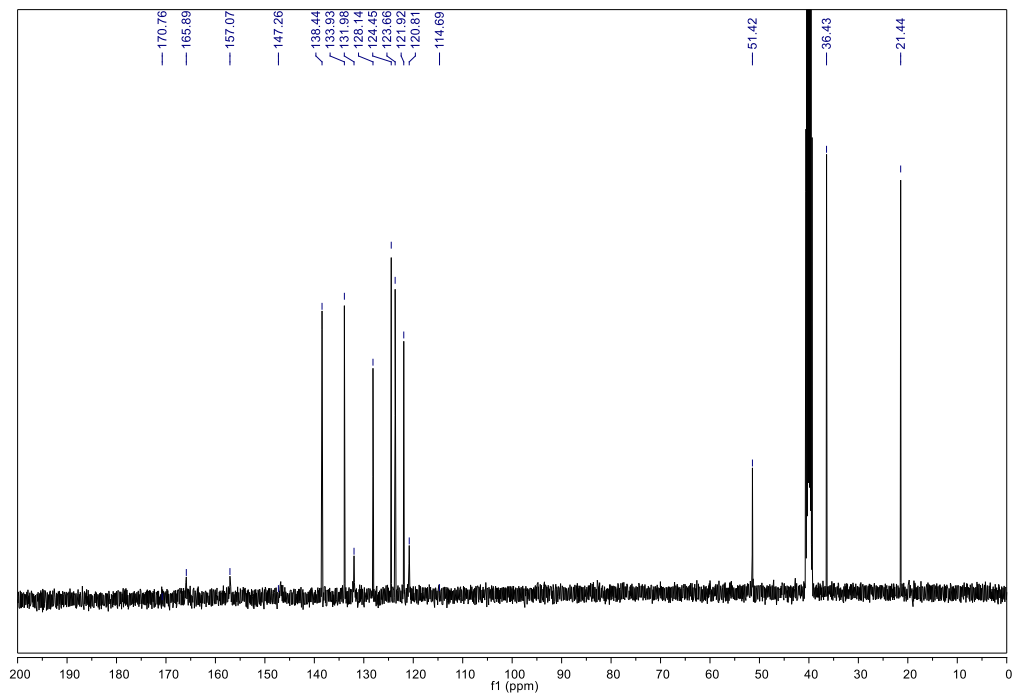

Figure S93.  $^{13}\text{C}$  NMR of Compound 26.

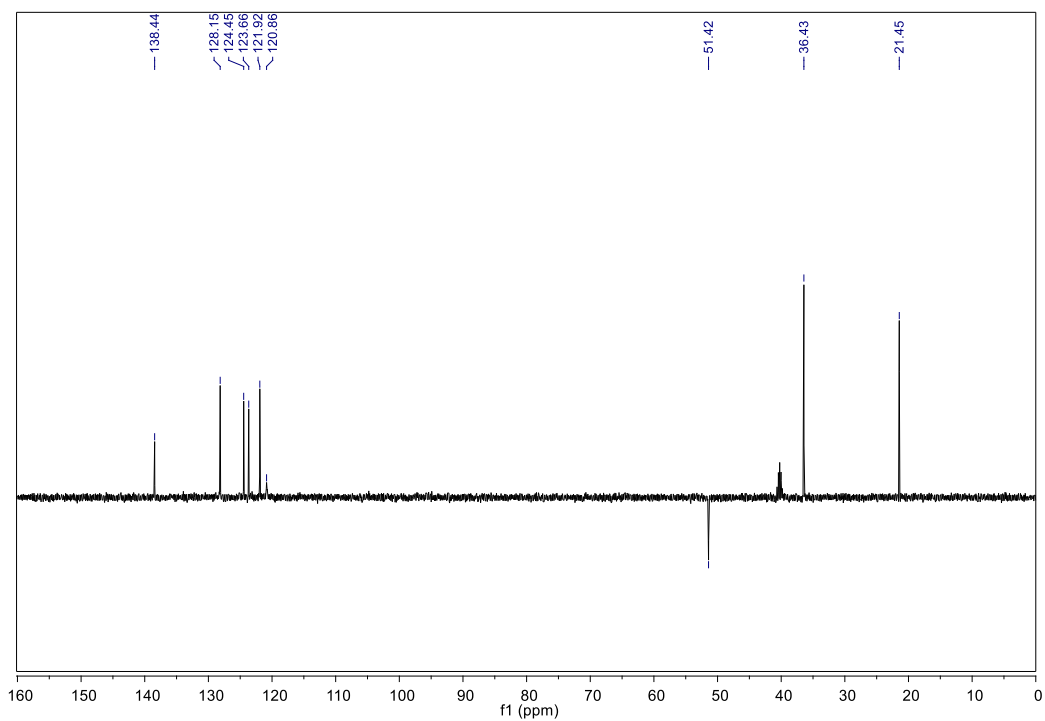

Figure S94. Dept-135 NMR of Compound 26.

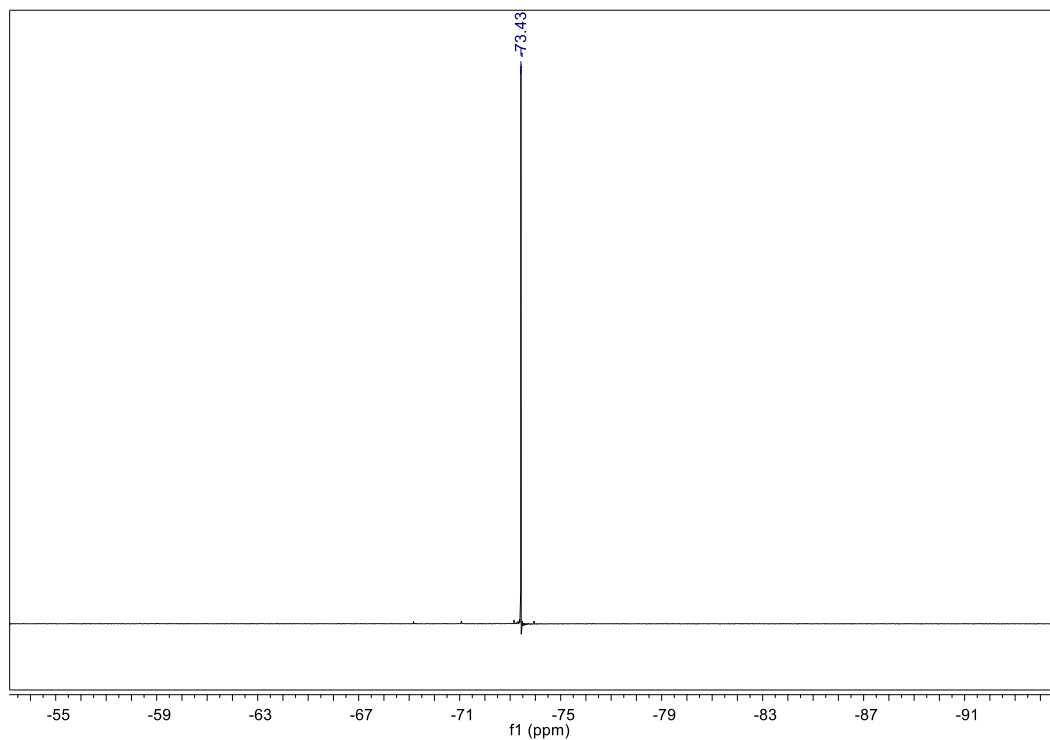

**Figure S95.**  $^{19}\text{F}$  NMR of Compound 26.

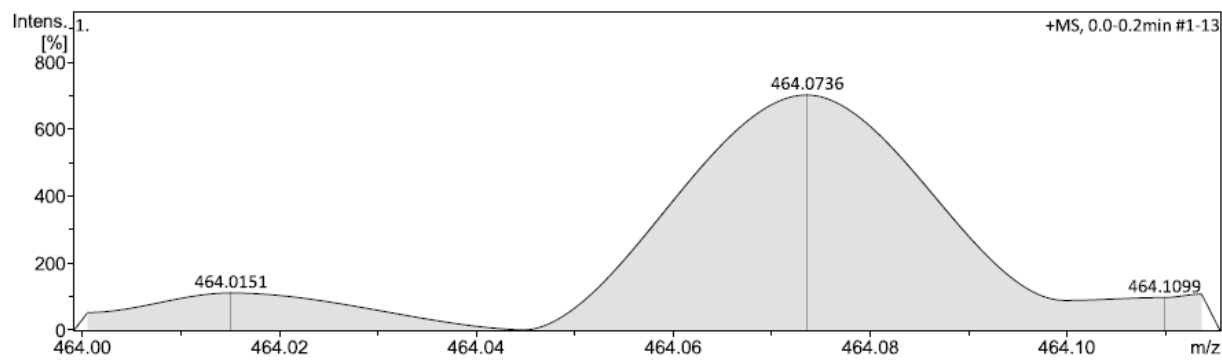

**Figure S96.** HRMS (ESI) of Compound 26.

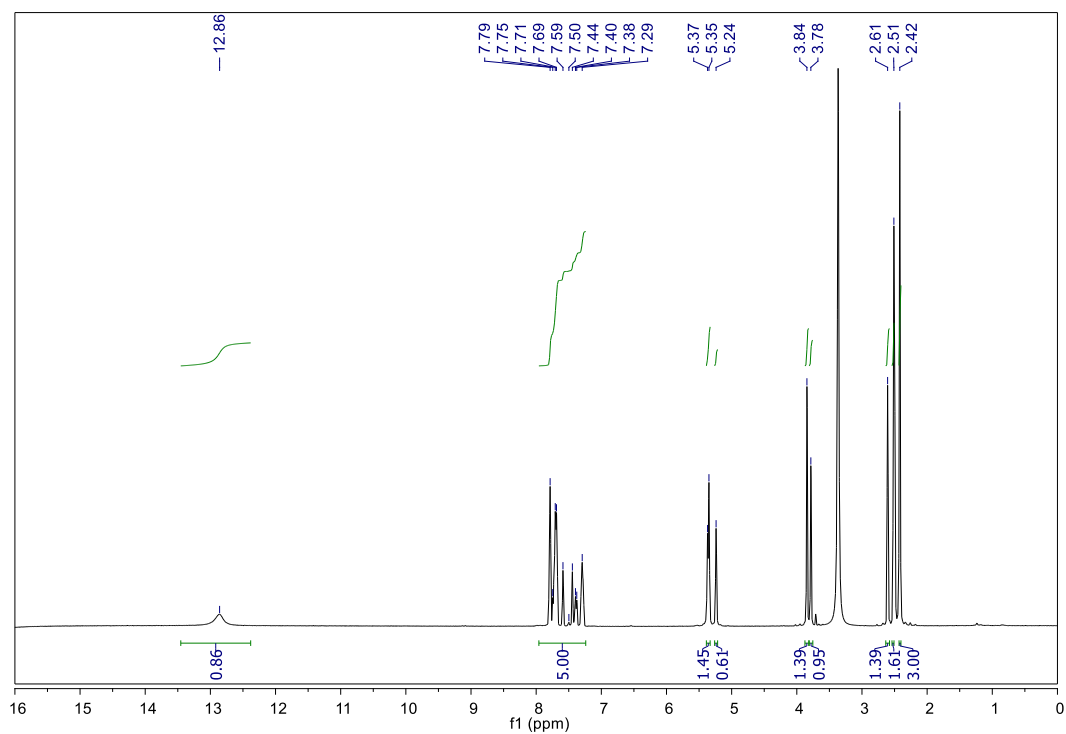

Figure S97. <sup>1</sup>H NMR of Compound 27.

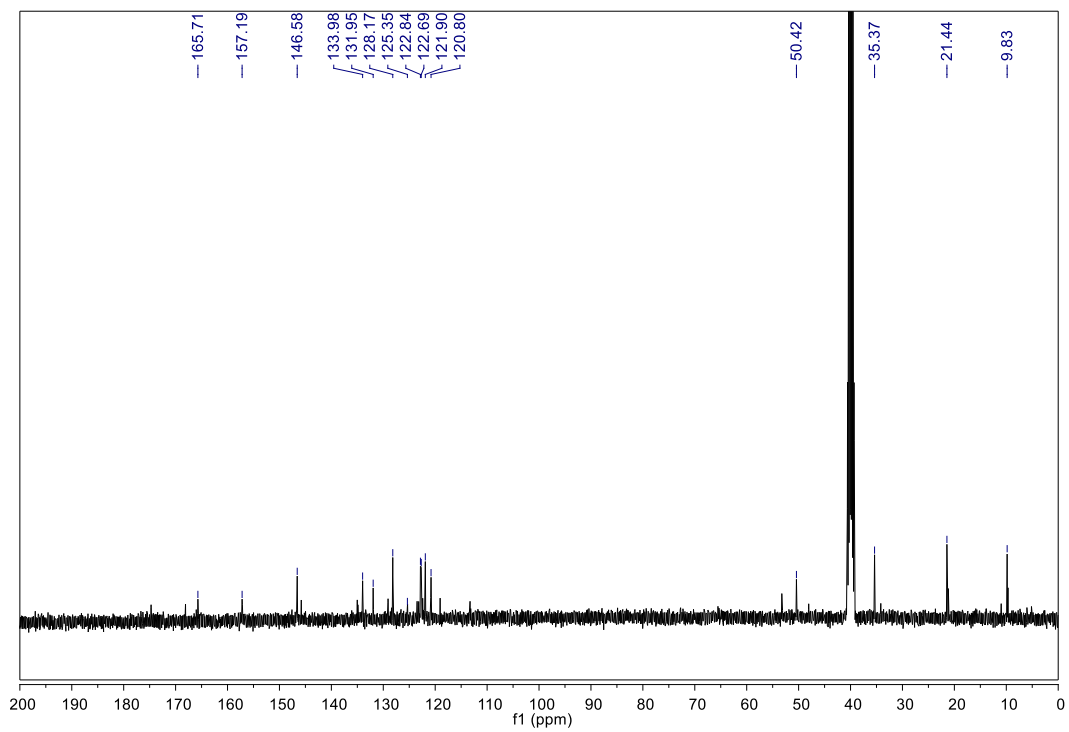

Figure S98. <sup>13</sup>C NMR of Compound 27.

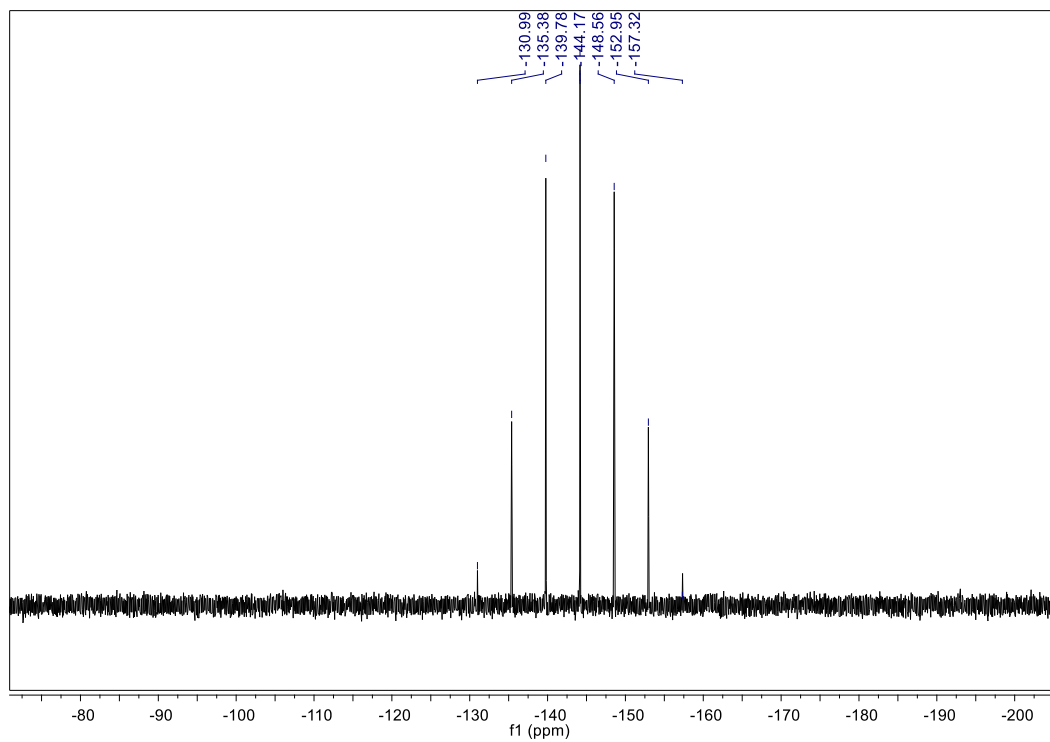

Figure S99.  $^{31}\text{P}$  NMR of Compound 27.

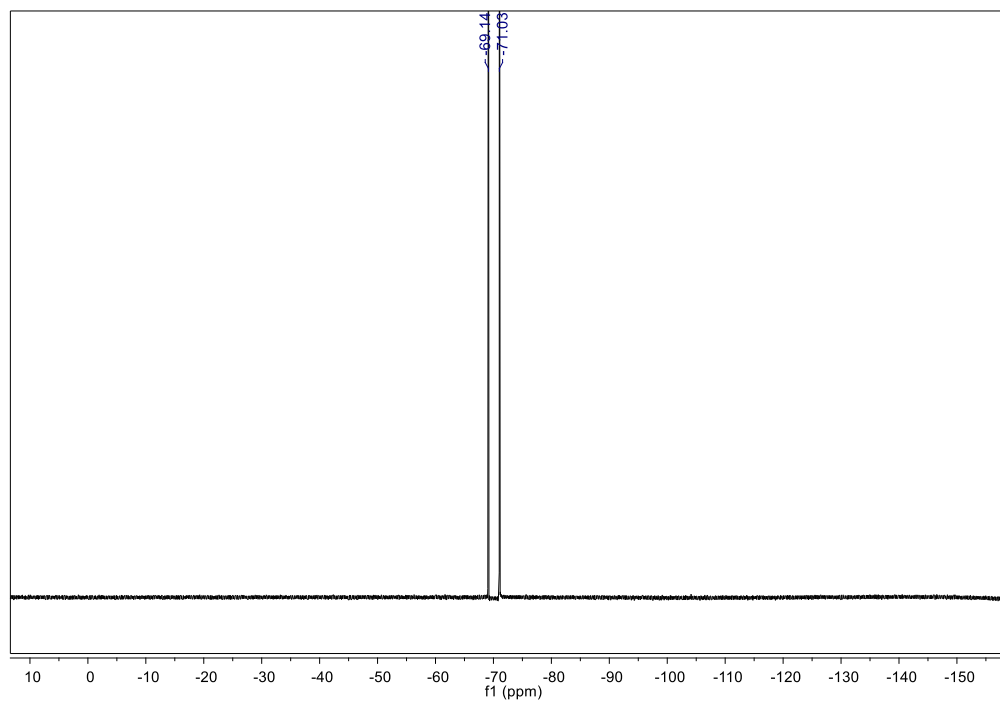

Figure S100.  $^{19}\text{F}$  NMR of Compound 27.



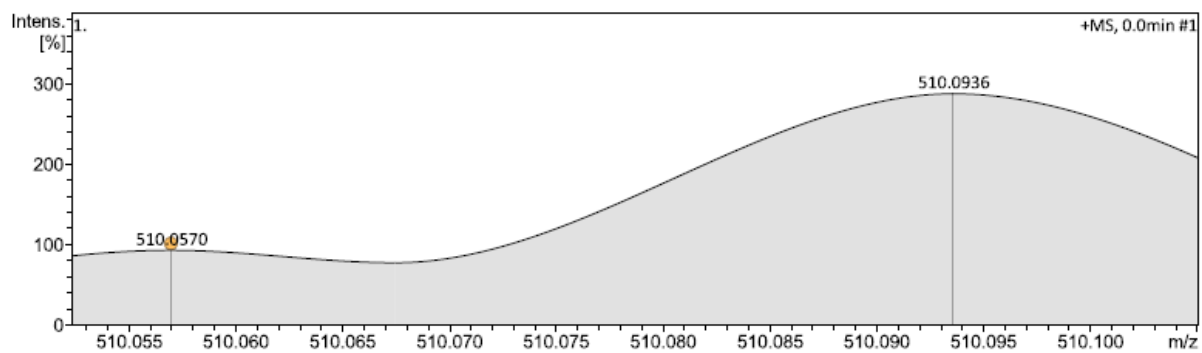

**Figure S101.** HRMS (ESI) of Compound **27**.

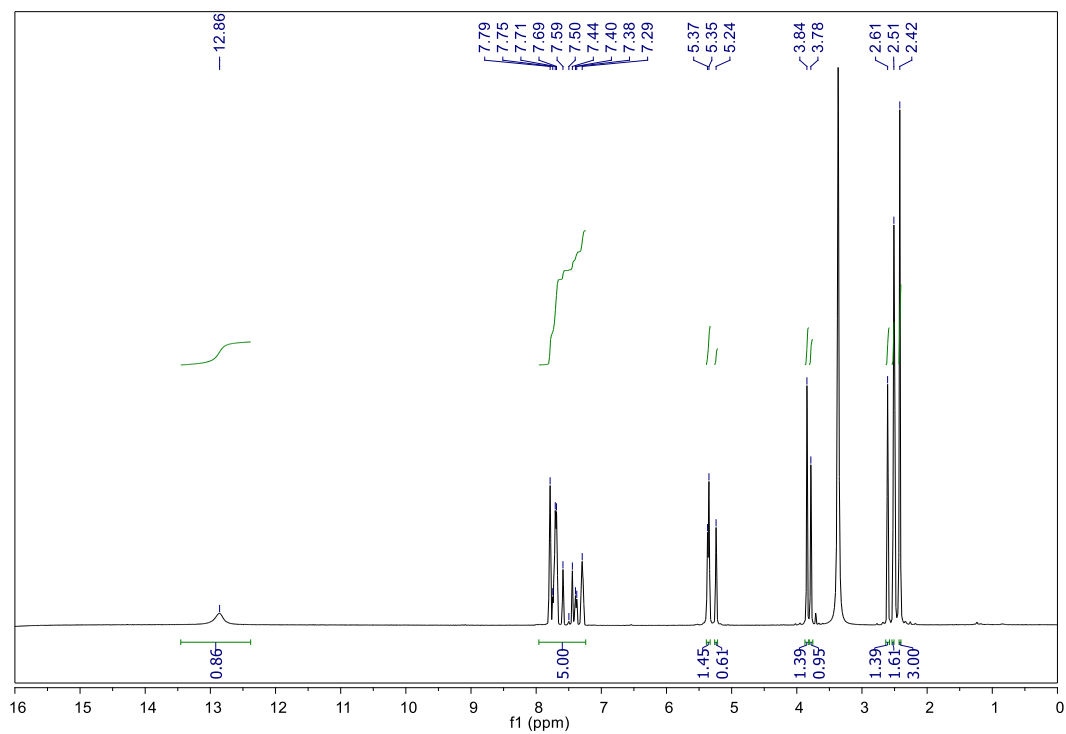

Figure S102.  $^1\text{H}$  NMR of Compound 28.

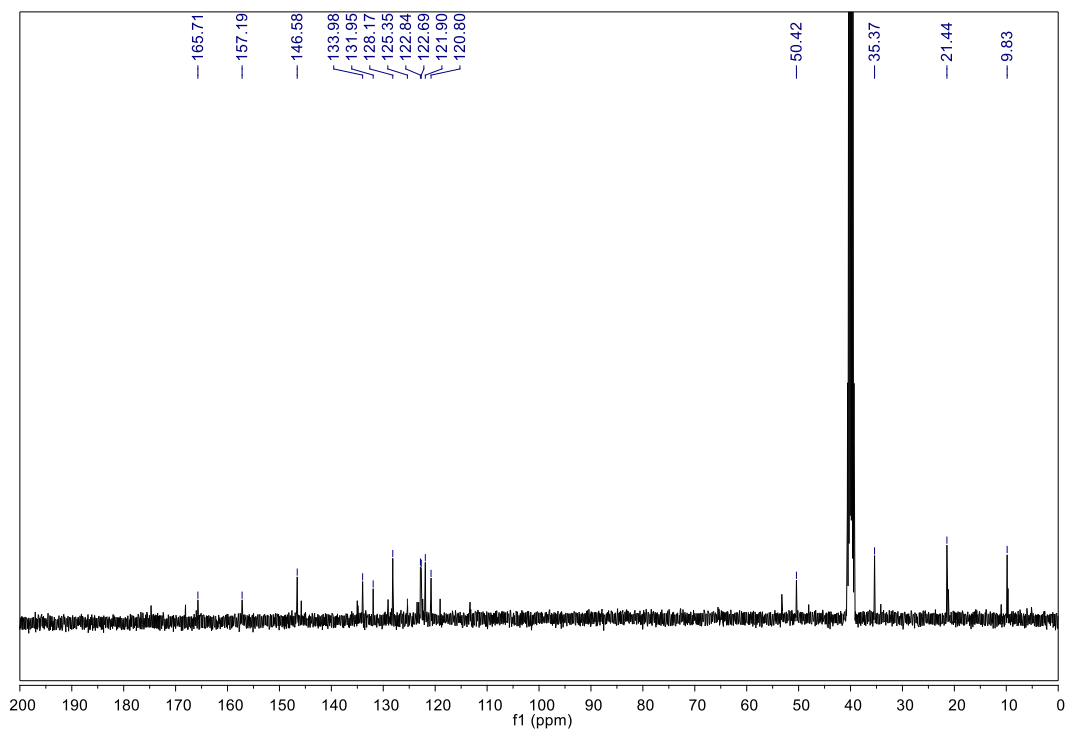

Figure S103.  $^{13}\text{C}$  NMR of Compound 28.

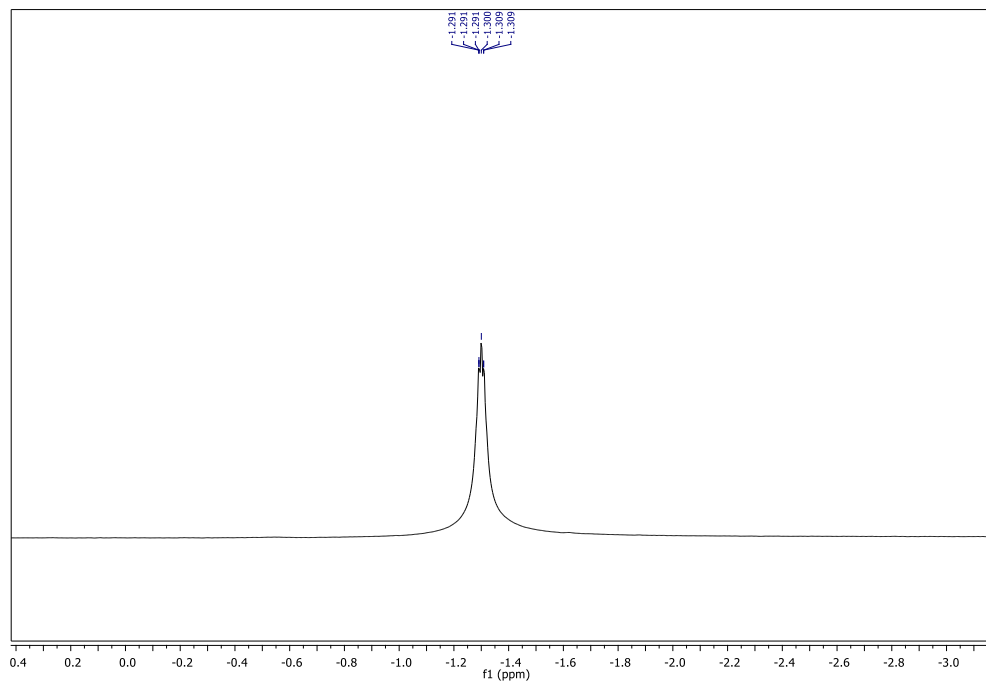

Figure S104.  $^{11}\text{B}$  NMR of Compound 28.

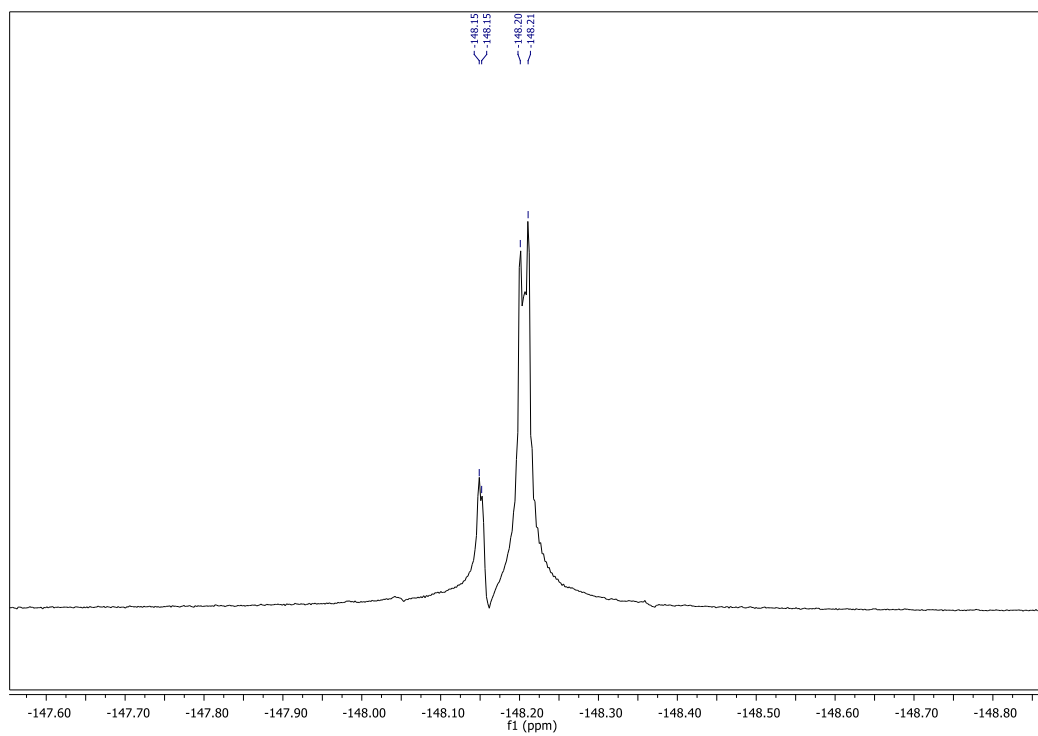

Figure S105.  $^{19}\text{F}$  NMR of Compound 28.

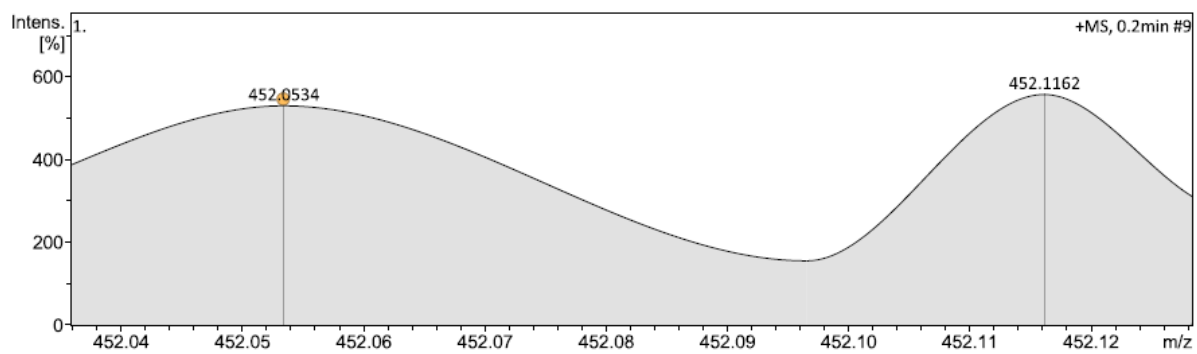

**Figure S106.** HRMS (ESI) of Compound **28**.

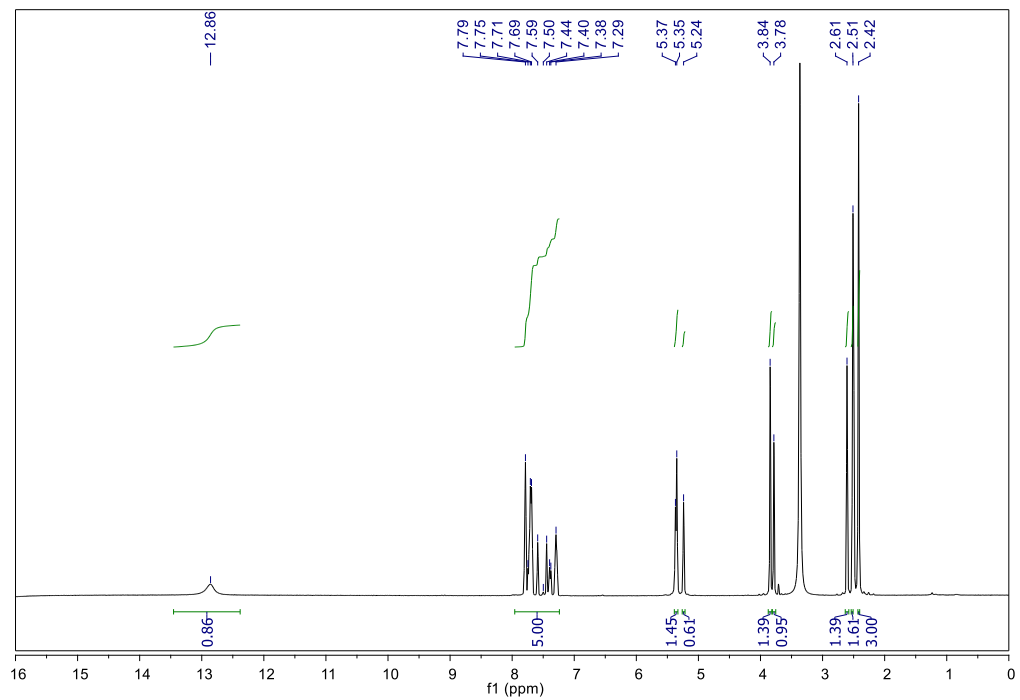

Figure S107.  $^1\text{H}$  NMR of Compound 29.

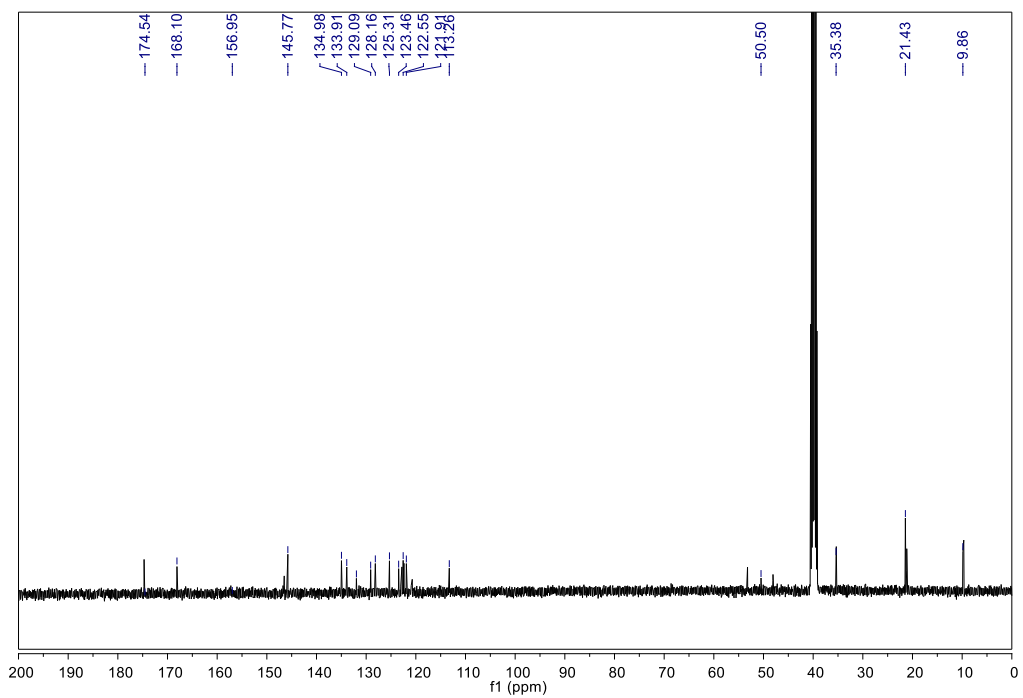

Figure S108.  $^{13}\text{C}$  NMR of Compound 29.

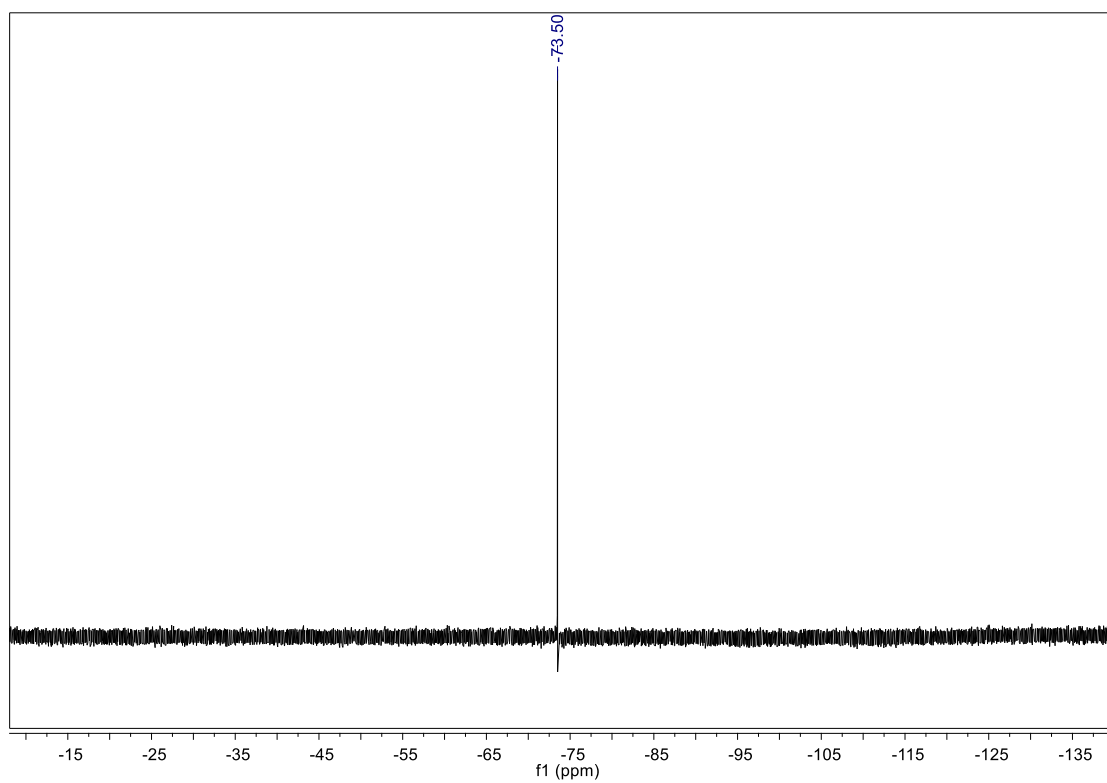

Figure S109.  $^{19}\text{F}$  NMR of Compound 29.

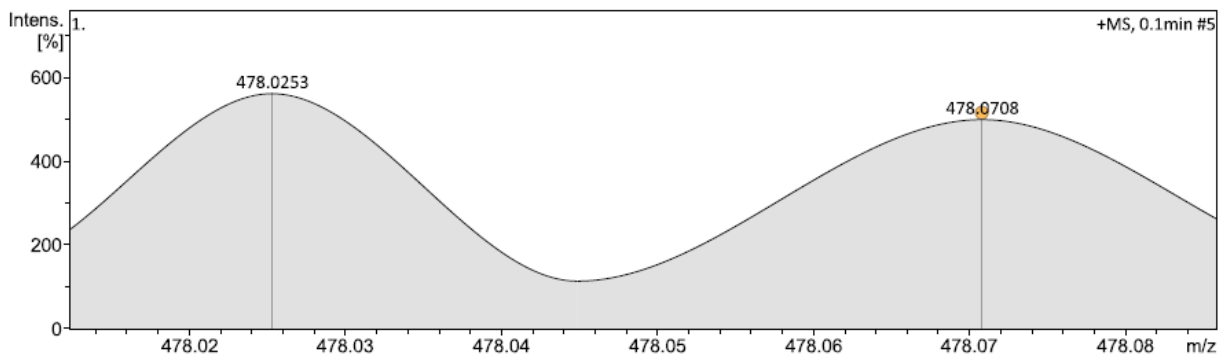

Figure S109. HRMS (ESI) of Compound 29.
